# Supplementary material for: Lanthano-phosphotungstate: A water soluble and reusable catalyst for oxidation of alcohols using H2O2 as an oxidant
Source: Royal Society of Chemistry journal article supplement (doi:10.1039/c4ra07302a), 2014-01-01
Supplement: c4ra07302a1.pdf [file c4ra07302a1.pdf]

## Supporting Information

### **Lanthano-phosphotungstates: A water soluble and reusable catalyst for oxidation of alcohol using H<sub>2</sub>O<sub>2</sub> as an oxidant**

Mukesh Kumar Saini,<sup>a</sup> Rakesh Gupta,<sup>a</sup> Swati Parbhakar,<sup>a</sup> Surendra Singh<sup>\*a</sup> and

Firasat Hussain<sup>\*a</sup>

#### **Contents:**

- I. Experimental section:** Syntheses of lanthano-phosphotungstate POM catalysts
- II. Catalysis section**
  - Table S1.** Gas chromatography data for oxidations of 1-phenylethanol with all lanthano-phosphotungstate POM catalysts at 90 °C temperature for 3 hours.
  - Table S2.** A detailed comparison of K<sub>11</sub>[Pr(PW<sub>11</sub>O<sub>39</sub>)<sub>2</sub>]·22H<sub>2</sub>O catalyst for the oxidation of 1-phenylethanol with reported literature.
  - Table S3.** Kinetics data for 1-phenylethanol oxidation reaction using **Pr-POM** catalyst at 90 °C for 120 minutes.
- III. Gas chromatographic analysis**
- IV. <sup>1</sup>H NMR data for all the catalytic products**
- V. Analytical characterization**
  - a) **Figure S3** Comparison of FT-IR spectra of fresh **Pr-POM** and recovered solid **Pr-POM** catalyst after 5<sup>th</sup> cycle.
  - b) **Figure S4** FT-IR spectra of **Pr – Yb** recovered POM catalysts after 1<sup>st</sup> cycle.

## I. Experimental section

### Syntheses of lanthano-phosphotungstate POM catalysts

**General:** The monolacunary POM precursor  $K_7[PW_{11}O_{39}] \cdot 14H_2O$  was prepared according to the literature procedure and its purity was subjected by FT-IR spectrum. All chemicals were commercially procured and were used without further purification. Fourier transform infrared (FT-IR) spectra were recorded with a Perkin-Elmer BX spectrum on KBr pellets. Thermogravimetric analysis (TGA) were performed using a TG/DTA instrument DTG-60 Shimadzu between temperature range of 25 and 700 °C in a nitrogen atmosphere with a heating rate of 5 °C/min. TGA was performed to evaluate the number of crystal water present in the synthesized compounds, and elemental analysis was performed using ICP-AES instrument.

**Synthesis of  $K_{11}[Pr(PW_{11}O_{39})_2] \cdot 22H_2O$  (Pr-POM).** 0.6400 g (0.2 mmol) of  $K_7[PW_{11}O_{39}] \cdot 14H_2O$  was dissolved in 25 ml of potassium acetate buffer (pH 4.8) with stirring. Later 0.0435 g (0.1 mmol) of  $Pr(NO_3)_3 \cdot 6H_2O$  was slowly added to the reaction mixture. The solution was stirred continuously at 50 °C for 30 min, followed by cooling to room temperature then filtering to remove the precipitate if found. The addition of a 1 M KCl solution (1 ml) to the colorless filtrate and slow evaporation at room temperature led to rod like faint green crystals after about 4-5 weeks. Yield 51 % (based on  $K_7[PW_{11}O_{39}] \cdot 14H_2O$ . FT-IR ( $cm^{-1}$ ): 1096(s), 1048(s), 951(s), 887(s), 836(m), 772(m), 727(m), 592(w), 512(m), 480(m). Elemental analysis (%); calcd.(found): W 63.9 (60.33), K 6.8 (6.02), P 0.98 (1.1).

**Synthesis of  $K_{11}[Nd(PW_{11}O_{39})_2] \cdot 25H_2O$  (Nd-POM).** The above synthetic protocol was followed by using 0.0438 g (0.1 mmol)  $Nd(NO_3)_3 \cdot 6H_2O$  instead of  $Pr(NO_3)_3 \cdot 6H_2O$ . Plate like crystals of faint violet color were obtained after about 4-5 weeks. Yield: 52 % (based on  $K_7[PW_{11}O_{39}] \cdot 14H_2O$ . FT-IR ( $cm^{-1}$ ) 1100(s), 1048(s), 957(s), 891(s), 840(m), 772(m), 724(m), 592(w), 508(m), 482(m). Elemental analysis (%); calcd.(found): W 63.4 (61.39), K 6.7 (6.2), P 0.97 (1.1).

**Synthesis of  $K_{11}[Eu(PW_{11}O_{39})_2] \cdot 26H_2O$  (Eu-POM).** The above synthetic protocol was followed by using 0.0428 g (0.1 mmol)  $Eu(NO_3)_3 \cdot 5H_2O$  instead of  $Pr(NO_3)_3 \cdot 6H_2O$ . Colorless plate like crystals obtained after about 4-5 weeks. Yield: 48 % (based on  $K_7[PW_{11}O_{39}] \cdot 14H_2O$ . FT-IR ( $cm^{-1}$ ) 1104(s), 1048(s), 953(s), 891(s), 838(m), 772(m), 727(m), 592(w), 512(m), 482(m). Elemental analysis (%); calcd.(found): W 63.1 (63.9), K 6.7 (6.3), P 0.97 (1.1).

**Synthesis of  $K_{11}[Gd(PW_{11}O_{39})_2] \cdot 32H_2O$  (Gd-POM).** The above synthetic protocol was followed by using 0.0451 g (0.1 mmol)  $Gd(NO_3)_3 \cdot 6H_2O$  instead of  $Pr(NO_3)_3 \cdot 6H_2O$ . Colorless needle like crystals obtained after about 4-5 weeks. Yield: 55 % (based on  $K_7[PW_{11}O_{39}] \cdot 14H_2O$ . FT-IR ( $cm^{-1}$ ) 1104(s), 1050(s), 955(s), 891(s), 842(m), 770(m), 729(m), 592(w), 512(m), 480(m). Elemental analysis (%); calcd.(found): W 62.1 (62.2), K 6.6 (6.0), P 0.95 (1.0).

**Synthesis of  $K_{11}[Tb(PW_{11}O_{39})_2] \cdot 22H_2O$  (Tb-POM).** The above synthetic protocol was followed by using 0.0435 g (0.1 mmol)  $Tb(NO_3)_3 \cdot 5H_2O$  instead of  $Pr(NO_3)_3 \cdot 6H_2O$ . Colorless rod like crystals obtained after about 4-5 weeks. Yield: 53 % (based on  $K_7[PW_{11}O_{39}] \cdot 14H_2O$ . FT-IR ( $cm^{-1}$ ) 1106(s), 1050(s), 951(s), 897(s), 838(m), 774(m), 729(m), 592(w), 516(m), 472(m). Elemental analysis (%); calcd.(found): W 63.8 (61.57), K 6.8 (7.2), P 0.98 (1.1).

**Synthesis of  $K_{11}[Dy(PW_{11}O_{39})_2] \cdot 25H_2O$  (Dy-POM).** The above synthetic protocol was followed by using 0.0438 g (0.1 mmol)  $Dy(NO_3)_3 \cdot 6H_2O$  instead of  $Pr(NO_3)_3 \cdot 6H_2O$ . Colorless needle like crystals obtained after about 4-5 weeks. Yield: 51 % (based on  $K_7[PW_{11}O_{39}] \cdot 14H_2O$ . FT-IR ( $cm^{-1}$ ) 1106(s), 1052(s), 953(s), 891(s), 845(m), 770(m), 719(m), 594(w), 512(m), 482(m). Elemental analysis (%); calcd.(found): W 63.2 (61.32), K 6.7 (6.1), P 0.97 (1.1).

**Synthesis of  $K_{11}[Ho(PW_{11}O_{39})_2] \cdot 24H_2O$  (Ho-POM).** The above synthetic protocol was followed by using 0.044 g (0.1 mmol)  $Ho(NO_3)_3 \cdot 5H_2O$  instead of  $Pr(NO_3)_3 \cdot 6H_2O$ . Needle like faint yellow crystals obtained after about 4-5 weeks. Yield: 54 % (based on  $K_7[PW_{11}O_{39}] \cdot 14H_2O$ . FT-IR ( $cm^{-1}$ ) 1110(s), 1050(s), 955(s), 893(s), 842(m), 770(m), 721(m), 594(w), 518(m), 486(m). Elemental analysis (%); calcd.(found): W 63.4 (63.25), K 6.7 (7.0), P 0.97 (1.1).

**Synthesis of  $K_{11}[Er(PW_{11}O_{39})_2] \cdot 31H_2O$  (Er-POM).** The above synthetic protocol was followed by using 0.0443 g (0.1 mmol)  $Er(NO_3)_3 \cdot 5H_2O$  instead of  $Pr(NO_3)_3 \cdot 6H_2O$ . Needle like faint pink crystals obtained after about 4-5 weeks. Yield: 56 % (based on  $K_7[PW_{11}O_{39}] \cdot 14H_2O$ . FT-IR ( $cm^{-1}$ ) 1110(s), 1050(s), 955(s), 895(s), 842(m), 772(m), 724(m), 592(w), 510(m), 480(m). Elemental analysis (%); calcd.(found): W 62.1 (60.92), K 6.6 (6.24), P 0.95 (1.0).

**Synthesis of  $K_{11}[Tm(PW_{11}O_{39})_2] \cdot 23H_2O$  (Tm-POM).** The above synthetic protocol was followed by using 0.0445 g (0.1 mmol)  $Tm(NO_3)_3 \cdot 5H_2O$  instead of  $Pr(NO_3)_3 \cdot 6H_2O$ . Colorless needle like crystals obtained after about 4-5 weeks. Yield: 52 % (based on  $K_7[PW_{11}O_{39}] \cdot 14H_2O$ . FT-IR ( $cm^{-1}$ ) 1110(s), 1050(s), 951(s), 893(s),

842(m), 774(m), 729(m), 594(w), 516(m), 480(m). Elemental analysis (%); calcd.(found): W 63.5 (61.62), K 6.75 (7.0), P 0.97 (1.1).

**Synthesis of  $K_{11}[Yb(PW_{11}O_{39})_2] \cdot 28H_2O$  (Yb-POM).** The above synthetic protocol was followed by using 0.0449 g (0.1 mmol)  $Yb(NO_3)_3 \cdot 5H_2O$  instead of  $Pr(NO_3)_3 \cdot 6H_2O$ . Colorless needle like crystals obtained after about 4-5 weeks. Yield: 52 % (based on  $K_7[PW_{11}O_{39}] \cdot 14H_2O$ ). FT-IR ( $cm^{-1}$ ) 1097(s), 1049(s), 951(s), 893(s), 835(m), 768(m), 718(m), 591(w), 506(m), 478(m). Elemental analysis (%); calcd.(found): W 62.6 (62.59), K 6.65 (6.13), P 0.96 (1.1).

### **Chemicals used in catalysis**

Reagent grade solvents were used for extraction and gas chromatography. All the reagents and chemicals were purchased from Sigma – Aldrich Chemical Co, Alfa Aesar, Lancaster and were used directly without further purification. The progress of reactions was checked by thin-layer chromatography (TLC, Merck silica gel 60 F-254 plates). The plates were visualized first with UV illumination followed by iodine. Gas chromatography was performed using DCM as a solvent.  $^1H$ -NMR spectra were recorded at 400 MHz and are reported in parts per million (ppm) on the  $\delta$  scale relative to TMS as an internal standard.

## **II. Supplementary catalysis section**

### **Catalytic reaction designed for 1-phenylethanol oxidation**

0.24 mol % of  $K_{11}[Ln(PW_{11}O_{39})_2] \cdot xH_2O$  was dissolved in 0.4 ml of distilled water in 25 ml round bottom flask with stirring. Then 2 mmol of 1-phenylethanol was added in it. And then 4 mmol of 30 % aq.  $H_2O_2$  was added dropwise to stirring solution and temperature of the reaction was set to be 90 °C for 3 hours. During the reaction a homogeneous reaction mixture was obtained. Reaction was monitored by TLC and per hour samples were collected to check the product conversion with the help of gas chromatography. After the catalytic reaction catalyst was recovered by the extraction with diethyl ether. When diethyl ether was added to the reaction mixture then organic product extract in organic solvent and catalyst remains in water. The catalyst containing water can be reused without further adding of POM catalyst.

**Table S1.** Gas chromatography data for 1-phenylethanol oxidations with all lanthano-phosphotungstate POM catalysts at 90 °C temperature and 3h<sup>a</sup>

| Entry | Catalyst                                   | Acetophenone conversion (%) at 3h |
|-------|--------------------------------------------|-----------------------------------|
| 01.   | $K_{11}[Pr(PW_{11}O_{39})_2] \cdot 22H_2O$ | 100                               |
| 02.   | $K_{11}[Nd(PW_{11}O_{39})_2] \cdot 25H_2O$ | 98                                |
| 03.   | $K_{11}[Eu(PW_{11}O_{39})_2] \cdot 26H_2O$ | 87                                |
| 04.   | $K_{11}[Gd(PW_{11}O_{39})_2] \cdot 32H_2O$ | 95                                |
| 05.   | $K_{11}[Tb(PW_{11}O_{39})_2] \cdot 22H_2O$ | 86                                |
| 06.   | $K_{11}[Dy(PW_{11}O_{39})_2] \cdot 25H_2O$ | 76                                |
| 07.   | $K_{11}[Ho(PW_{11}O_{39})_2] \cdot 24H_2O$ | 89                                |
| 08.   | $K_{11}[Er(PW_{11}O_{39})_2] \cdot 31H_2O$ | 90                                |
| 09.   | $K_{11}[Tm(PW_{11}O_{39})_2] \cdot 23H_2O$ | 97                                |
| 10.   | $K_{11}[Yb(PW_{11}O_{39})_2] \cdot 28H_2O$ | 85                                |

<sup>a</sup>The reaction conditions were, a suspension of 2 mmol of 1-phenylethanol, 0.24 mol % of Ln-POM catalysts, 0.4 ml of H<sub>2</sub>O and 4 mmol of H<sub>2</sub>O<sub>2</sub> stirred at 90 °C for 3 h.

**Table S2.** Comparison of  $K_{11}[\text{Pr}(\text{PW}_{11}\text{O}_{39})_2] \cdot 22\text{H}_2\text{O}$  catalyst for the oxidation of 1-phenylethanol with reported literature

| Catalysts                                                                                                                                                                                                                                                                                                                                         | Solvent                                | Catalysts Loading (mol %) | $\text{H}_2\text{O}_2$ : substrate (mmol) | Temperature ( $^{\circ}\text{C}$ ) | Time (h) | Conversion    | TOF <sup>a</sup> ( $\text{h}^{-1}$ ) |
|---------------------------------------------------------------------------------------------------------------------------------------------------------------------------------------------------------------------------------------------------------------------------------------------------------------------------------------------------|----------------------------------------|---------------------------|-------------------------------------------|------------------------------------|----------|---------------|--------------------------------------|
| $K_8[\beta\text{-SiW}_{11}\text{O}_{39}] \cdot 14\text{H}_2\text{O}^{4(i)}$                                                                                                                                                                                                                                                                       | $\text{H}_2\text{O}$                   | 0.93                      | 5:1                                       | 90                                 | 7        | 99            | 15.2                                 |
| $K_8[\text{BW}_{11}\text{O}_{39}\text{H}] \cdot 13\text{H}_2\text{O}^{4(f)}$                                                                                                                                                                                                                                                                      | $\text{H}_2\text{O}$                   | 1.5                       | 2:1                                       | 90                                 | 3        | 99            | 2.2                                  |
| $K_8[\gamma\text{-SiW}_{10}\text{O}_{36}] \cdot 13\text{H}_2\text{O}^{4(e)}$                                                                                                                                                                                                                                                                      | $\text{H}_2\text{O}$                   | 0.67                      | 5:1                                       | 90                                 | 7        | 100           | 2.1                                  |
| $K_{10}\text{Zn}_4(\text{H}_2\text{O})_2(\text{PW}_9\text{O}_{34})_2 \cdot 20\text{H}_2\text{O}^{4(g)}$                                                                                                                                                                                                                                           | $\text{H}_2\text{O}$                   | 0.9                       | 5:1                                       | 90                                 | 3        | 99            | 36.7                                 |
| $[(\text{C}_{18}\text{H}_{37})_2(\text{CH}_3)_2\text{N}]_8\text{K}_2[\text{Zn}_4(\text{H}_2\text{O})^{4(g)}(\text{PW}_9\text{O}_{34})_2]$                                                                                                                                                                                                         | $\text{H}_2\text{O}$                   | 0.45                      | 5:1                                       | 90                                 | 3        | 99            | 73.3                                 |
| $\text{Na}_{12}[(\text{WZn}_3(\text{H}_2\text{O})_2)[\text{ZnW}_9\text{O}_{34}]_2]^{4(b)}$                                                                                                                                                                                                                                                        | $\text{H}_2\text{O}$                   | 0.4                       | 5:1                                       | 75                                 | 7        | 100           | 35.7                                 |
| $\text{Na}_{12}[(\text{WZn}_3(\text{H}_2\text{O})_2)[\text{ZnW}_9\text{O}_{34}]_2]^{4(a)}$<br>With TEMPO                                                                                                                                                                                                                                          | $\text{H}_2\text{O}$                   | 0.4                       | 5:1                                       | 85                                 | 7        | 100           | 35.7                                 |
| $\text{Na}_6[\text{SiW}_{11}\text{ZnH}_2\text{O}_{40}] \cdot 12\text{H}_2\text{O}^{4(c)}$                                                                                                                                                                                                                                                         | $\text{H}_2\text{O}/\text{oil}$        | 0.21                      | 2:1                                       | 90                                 | 7        | 100           | 68.0                                 |
| $\text{Na}_8\text{HPW}_9\text{O}_{34}$ + Cetylpyridinium chloride <sup>4(i)</sup>                                                                                                                                                                                                                                                                 | $\text{H}_2\text{O}$                   | 0.7                       | 5:1                                       | 85                                 | 5        | 94            | 26.9                                 |
| $[(\text{C}_{18}\text{H}_{37})_2(\text{CH}_3)_2\text{N}]_{10}[\text{SiW}_9\text{O}_{34}]^{4(h)}$                                                                                                                                                                                                                                                  | $\text{H}_2\text{O}$                   | 0.6                       | 5:1                                       | 65                                 | 6        | 99            | 27.5                                 |
| $[(\text{C}_{18}\text{H}_{37})_2(\text{CH}_3)_2\text{N}]_7[\text{PW}_{11}\text{O}_{39}]^{2(k)}$                                                                                                                                                                                                                                                   | 1,4-dioxane                            | 0.8                       | 5:1                                       | 85                                 | 7        | 98            | 17.5                                 |
| $\text{TBA}_8[\{\text{Zn}(\text{OH}_2)(\mu_3\text{-OH})\}_2\{\text{Zn}(\text{OH}_2)_2\}_2\{\gamma\text{-HSiW}_{10}\text{O}_{36}\}_2] \cdot 9\text{H}_2\text{O}^{2(i)}$                                                                                                                                                                            | acetone                                | 0.4                       | 1:2                                       | 56                                 | 1.5      | 83            | 138.3                                |
| $\text{TBA}_8[\{\text{Zn}_2\text{W}(\text{O})\text{O}_3\}_2\text{H}_4\{\alpha\text{-SiW}_9\text{O}_{33}\}_2] \cdot 5\text{H}_2\text{O}^{2(i)}$                                                                                                                                                                                                    | acetone                                | 0.4                       | 1:2                                       | 56                                 | 1.5      | 92            | 153.3                                |
| $\text{TBA}_8[\{\text{Zn}_2\text{W}(\text{O})\text{O}_3\}_2\text{H}_4\{\beta\text{-SiW}_9\text{O}_{33}\}_2] \cdot 7\text{H}_2\text{O}^{2(i)}$                                                                                                                                                                                                     | acetone                                | 0.4                       | 1:2                                       | 56                                 | 1.5      | 94            | 156.7                                |
| $[\text{n-C}_{16}\text{H}_{33}\text{N}(\text{CH}_3)_3]\text{PW}_{12}\text{O}_{40}^{3(b)}$                                                                                                                                                                                                                                                         | solvent free                           | 0.25                      | 1:1                                       | 90                                 | 6        | 95            | 63.3                                 |
| $[\text{Hmim}]_3\text{PW}_{12}\text{O}_{40}^{2(e)}$                                                                                                                                                                                                                                                                                               | $\text{CH}_3\text{CN}$                 | 0.3 g                     | 3:1                                       | 80                                 | 12       | 100           | -                                    |
| $\text{H}_3\text{PMo}_{12}\text{O}_{40}$ , $\text{H}_3\text{SiMo}_{12}\text{O}_{40}$ , $\text{H}_4\text{PW}_{12}\text{O}_{40}$ , $\text{H}_4\text{SiW}_{12}\text{O}_{40}$ , $\text{H}_6\text{PMo}_{11}\text{AlO}_{40}$ , $\text{H}_4\text{PMo}_{11}\text{VO}_{40}$ , $\text{H}_4\text{PMo}_{11}\text{Al}_{0.5}\text{V}_{0.5}\text{O}_{40}^{2(i)}$ | $\text{CH}_3\text{CN}$                 | 3.0                       | 10:0.7                                    | 70                                 | 9        | 95            | 3.5                                  |
| <b><math>K_{11}[\text{Pr}(\text{PW}_{11}\text{O}_{39})_2] \cdot 22\text{H}_2\text{O}</math> (this work)</b>                                                                                                                                                                                                                                       | <b><math>\text{H}_2\text{O}</math></b> | <b>0.24</b>               | <b>2:1</b>                                | <b>90</b>                          | <b>3</b> | <b>&gt;99</b> | <b>137.5</b>                         |

<sup>a</sup>Turn over frequencies (TOF) were calculated by using  $\text{TOF} = \text{conversion of product (mmol)}/\text{Catalyst (mmol)} \times \text{Time (h)}$

**Table S3.** Kinetics data for 1-phenylethanol oxidation reaction using **Pr-POM** catalyst at 90 °C for 120 minutes<sup>a</sup>

| Substrate (mol %) | Time (min) | Product conversion with time in (mol %) | C/C <sub>0</sub> after t time for substrate | ln(C/C <sub>0</sub> ) |
|-------------------|------------|-----------------------------------------|---------------------------------------------|-----------------------|
| 2                 | 20         | 0.8434                                  | 0.5783                                      | -0.54766              |
|                   | 40         | 1.104                                   | 0.448                                       | -0.80296              |
|                   | 60         | 1.2754                                  | 0.3623                                      | -1.05128              |
|                   | 80         | 1.4506                                  | 0.2747                                      | -1.29208              |
|                   | 100        | 1.5526                                  | 0.2237                                      | -1.49745              |
|                   | 120        | 1.6838                                  | 0.1581                                      | -1.84453              |

<sup>a</sup>The reaction conditions were, a suspension of 2 mmol of 1-phenylethanol, 0.24 mol% of Pr-POM catalyst, 0.4 ml of H<sub>2</sub>O and 4 mmol of H<sub>2</sub>O<sub>2</sub> stirred at 90 °C for 120 minutes.

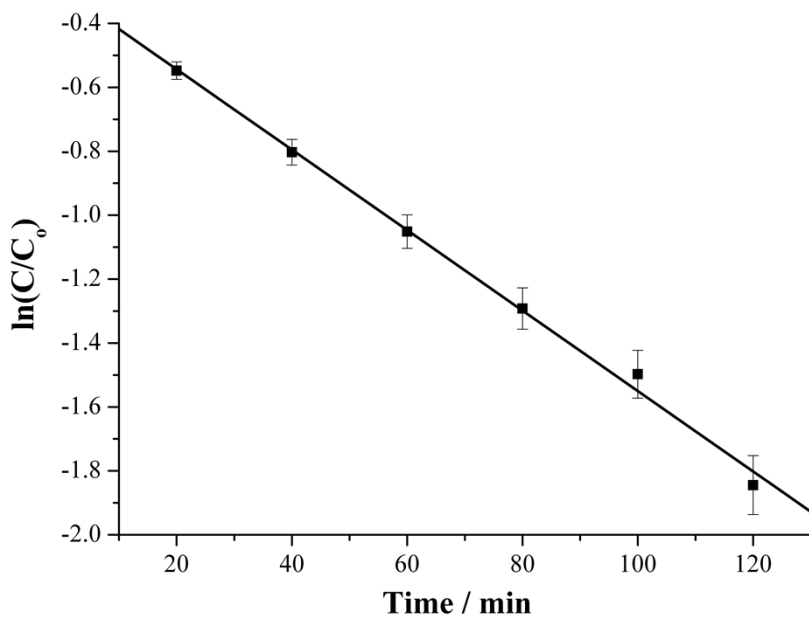

**Figure S1** Kinetics of 1-phenylethanol oxidation reaction for Pr(III)-POM at 90 °C for 120 min.

### III Gas chromatographic analysis

#### Gas chromatogram of standard 1-phenylethanol

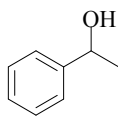

GC conditions for standard 1-phenylethanol. Column information Rtx-5, L = 30m, 0.25mmID, injector temperature 220 °C, column flow rate 1.00 ml/min, column temperature 100 – 120 °C, temperature program 5 °C/min, detector temperature 250 °C.

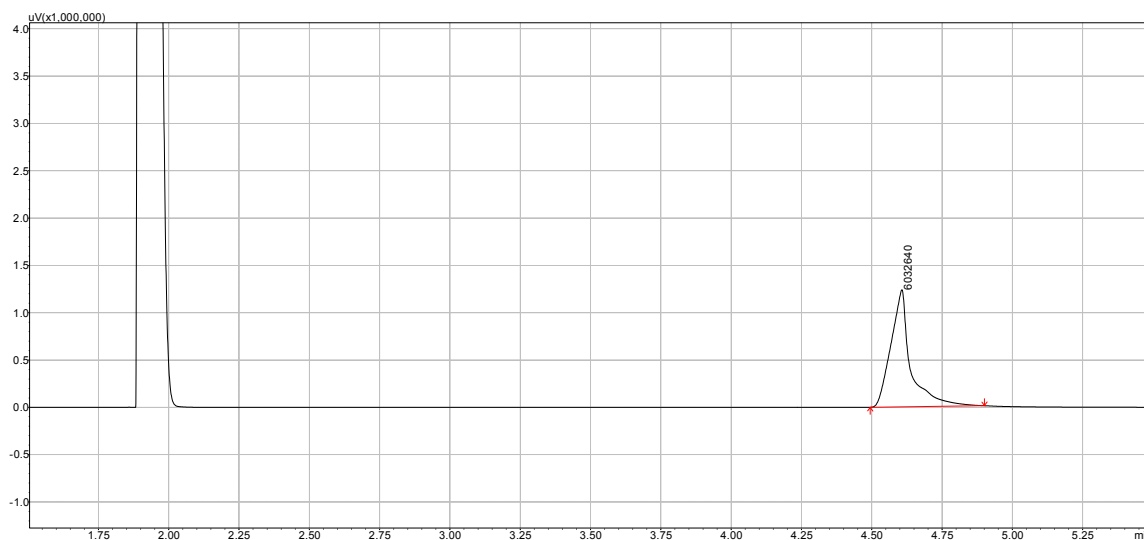

| Peak# | Ret. time | Area      | Height    | Conc.     | Area%    | Compound name   |
|-------|-----------|-----------|-----------|-----------|----------|-----------------|
| 1     | 4.607     | 6032640.1 | 1220520.9 | 100.00000 | 100.0000 | 1-phenylethanol |

#### GC chromatogram for standard acetophenone

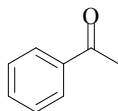

GC conditions for standard acetophenone are same as above mentioned for 1-phenylethanol.



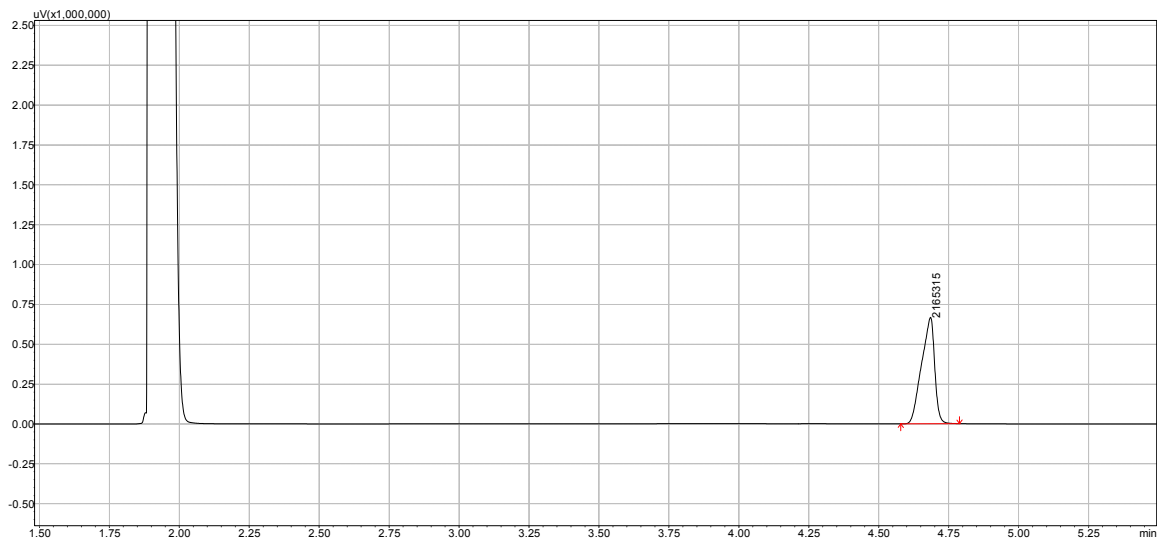

| Peak# | Ret. time | Area      | Height   | Conc.     | Area%    | Compound name |
|-------|-----------|-----------|----------|-----------|----------|---------------|
| 1     | 4.685     | 2165315.0 | 648175.9 | 100.00000 | 100.0000 | Acetophenone  |

**Gas chromatogram for the oxidation of 1-phenylethanol to acetophenone product**  
 GC conditions are same as standard 1-phenylethanol.

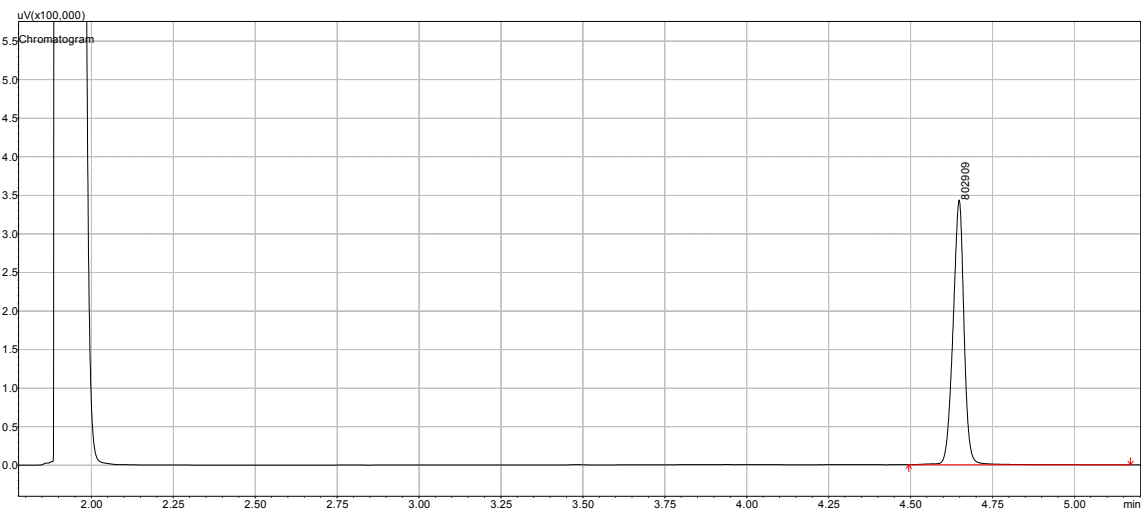

| Peak# | Ret. time | Area     | Height   | Conc.     | Area%    | Compound name |
|-------|-----------|----------|----------|-----------|----------|---------------|
| 1     | 4.648     | 802908.5 | 338694.7 | 100.00000 | 100.0000 | Acetophenone  |

### Gas chromatogram for standard 1-(4-bromophenyl)ethanol

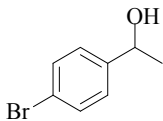

GC conditions for standard 1-(4-bromophenyl)ethanol. Column information Rtx-5, L = 30m, 0.25mmID, injector temperature 220 °C, column flow rate 1.00 ml/min, column temperature 100 – 180 °C, temperature program 3 °C/min, detector temperature 250 °C.

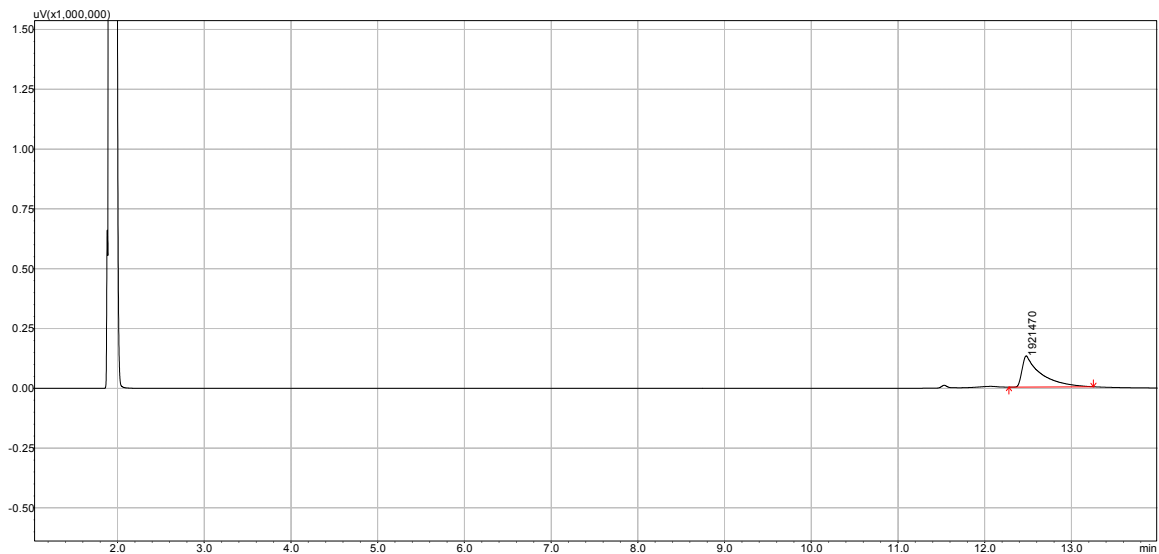

| Peak# | Ret. time | Area      | Height   | Conc.     | Area%    | Compound name            |
|-------|-----------|-----------|----------|-----------|----------|--------------------------|
| 1     | 12.480    | 1921469.9 | 129947.7 | 100.00000 | 100.0000 | 1-(4-bromophenyl)ethanol |

### Gas chromatogram for standard 1-(4-bromophenyl)ethanone

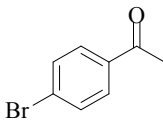

GC conditions are same as standard 1-(4-bromophenyl)ethanol.

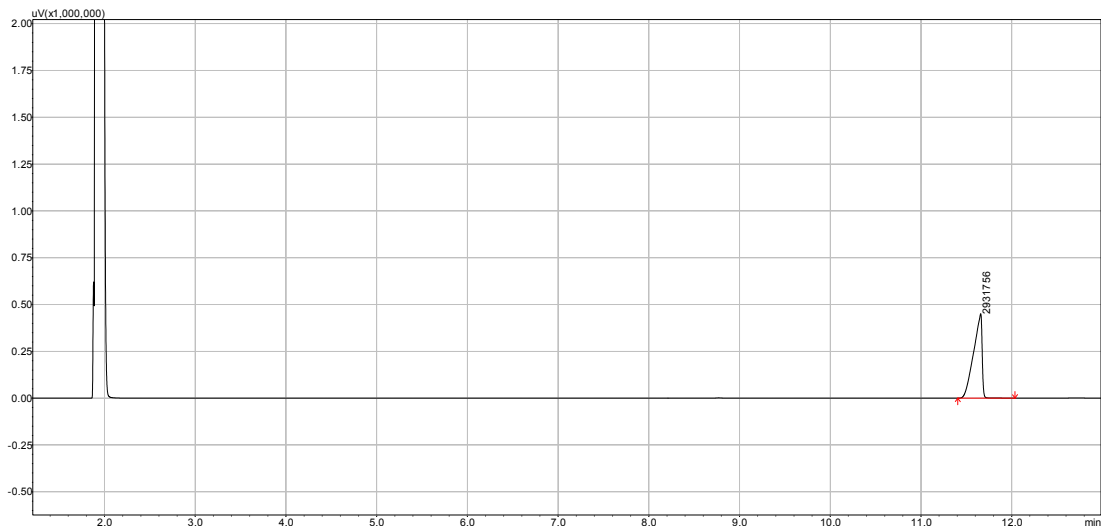

| Peak# | Ret. time | Area      | Height   | Conc.     | Area%    | Compound name             |
|-------|-----------|-----------|----------|-----------|----------|---------------------------|
| 1     | 11.658    | 2931756.1 | 448673.3 | 100.00000 | 100.0000 | 1-(4-bromophenyl)ethanone |

**Gas chromatogram for the oxidation of 1-(4-bromophenyl)ethanol to 1-(4-bromophenyl)ethanone product**

GC conditions are same as standard 1-(4-bromophenyl)ethanol.

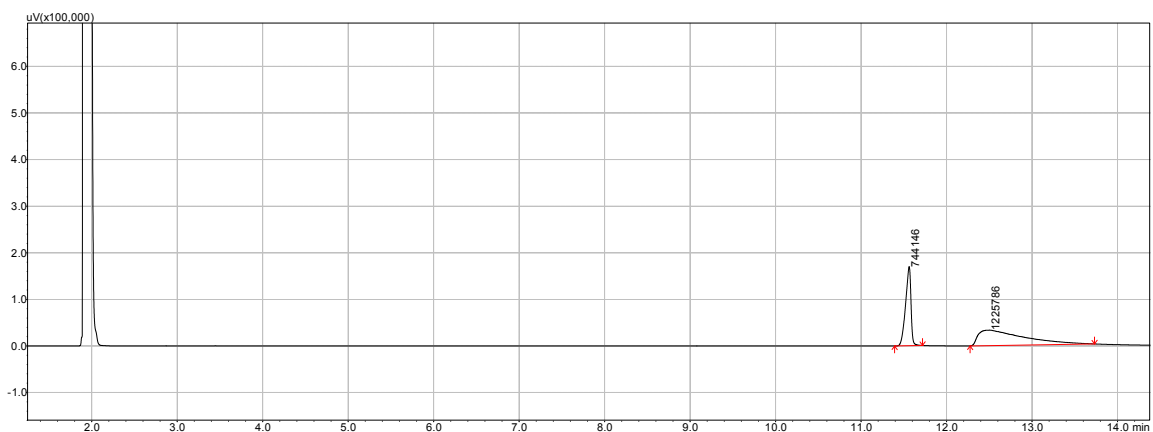

| Peak# | Ret. time | Area      | Height   | Conc.    | Area%   | Compound name             |
|-------|-----------|-----------|----------|----------|---------|---------------------------|
| 1     | 11.562    | 744146.0  | 169589.4 | 37.77522 | 37.7752 | 1-(4-bromophenyl)ethanone |
| 2     | 12.503    | 1225785.6 | 33121.3  | 62.22478 | 62.2248 | 1-(4-bromophenyl)ethanol  |

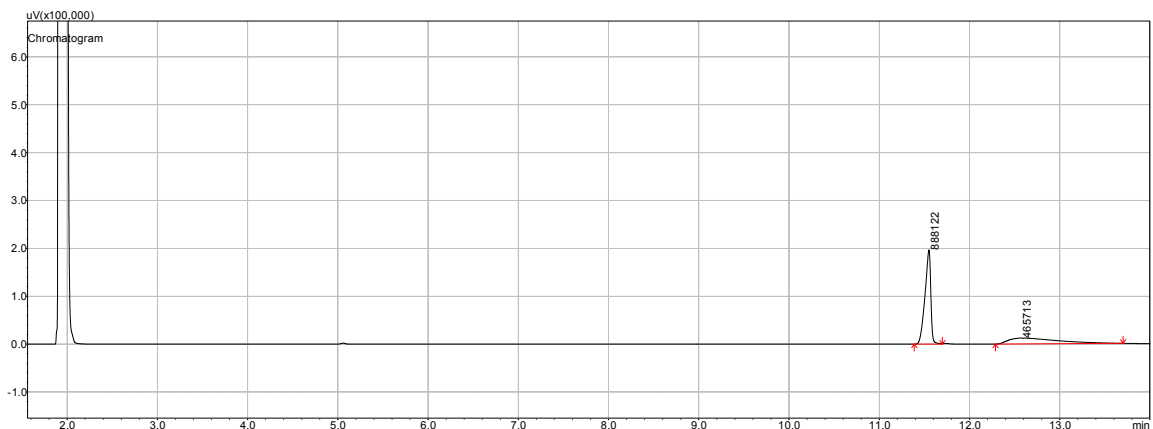

| Peak# | Ret. time | Area     | Height   | Conc.    | Area%   | Compound name             |
|-------|-----------|----------|----------|----------|---------|---------------------------|
| 1     | 11.550    | 888122.2 | 196085.3 | 65.60045 | 65.6005 | 1-(4-bromophenyl)ethanone |
| 2     | 12.571    | 465713.2 | 12418.6  | 34.39955 | 34.3995 | 1-(4-bromophenyl)ethanol  |

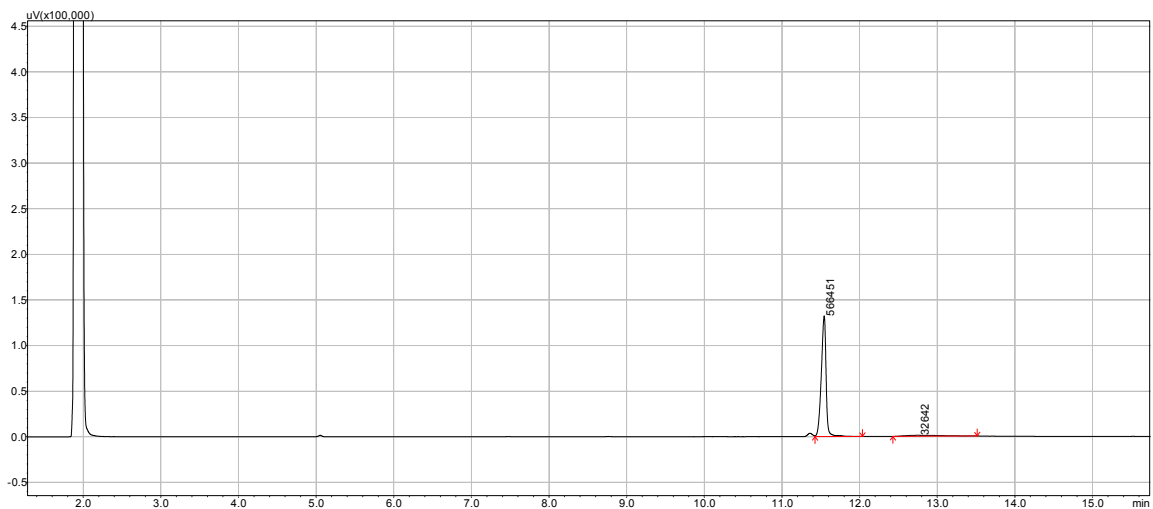

| Peak# | Ret. time | Area     | Height   | Conc.    | Area%   | Compound name             |
|-------|-----------|----------|----------|----------|---------|---------------------------|
| 1     | 11.544    | 566450.6 | 132140.9 | 94.55150 | 94.5515 | 1-(4-bromophenyl)ethanone |
| 2     | 12.764    | 32641.6  | 1045.2   | 5.44850  | 5.4485  | 1-(4-bromophenyl)ethanol  |

### Gas chromatogram for standard 1-(3-bromophenyl)ethanol

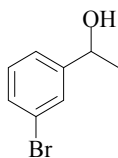

GC conditions for standard 1-(3-bromophenyl)ethanol. Column information Rtx-5, L = 30m, 0.25mmID, injector temperature 220 °C, column flow rate 1.00 ml/min, column temperature 100 – 180 °C, temperature program 3 °C/min, detector temperature 250 °C.

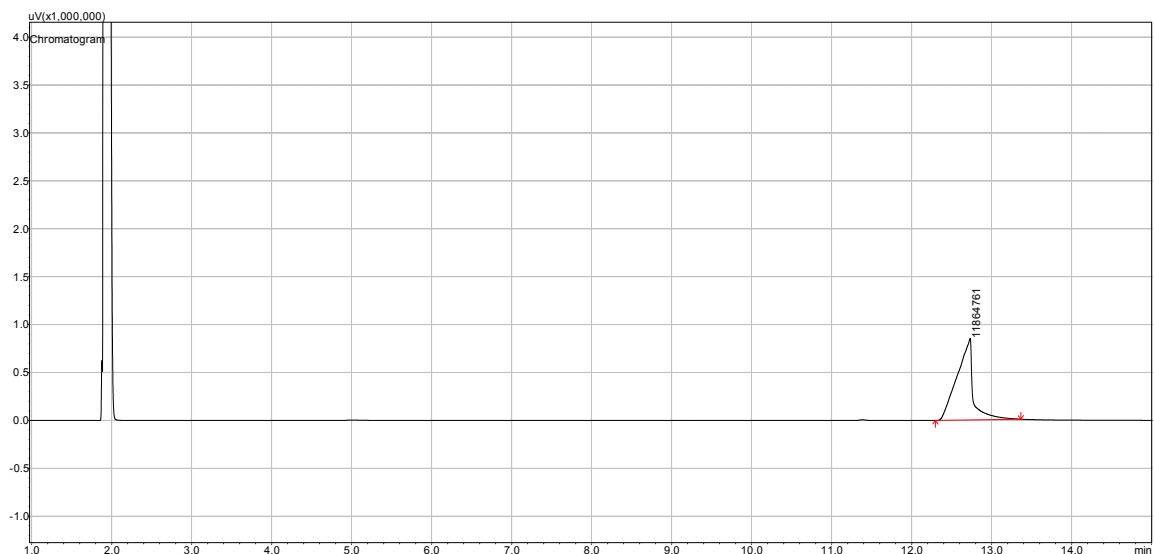

| Peak# | Ret. time | Area       | Height   | Conc.     | Area%    | Compound name            |
|-------|-----------|------------|----------|-----------|----------|--------------------------|
| 1     | 12.732    | 11864761.1 | 847191.6 | 100.00000 | 100.0000 | 1-(3-bromophenyl)ethanol |

### Gas chromatogram for standard 1-(3-bromophenyl)ethanone

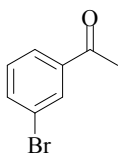

GC conditions are same as standard 1-(3-bromophenyl)ethanol.

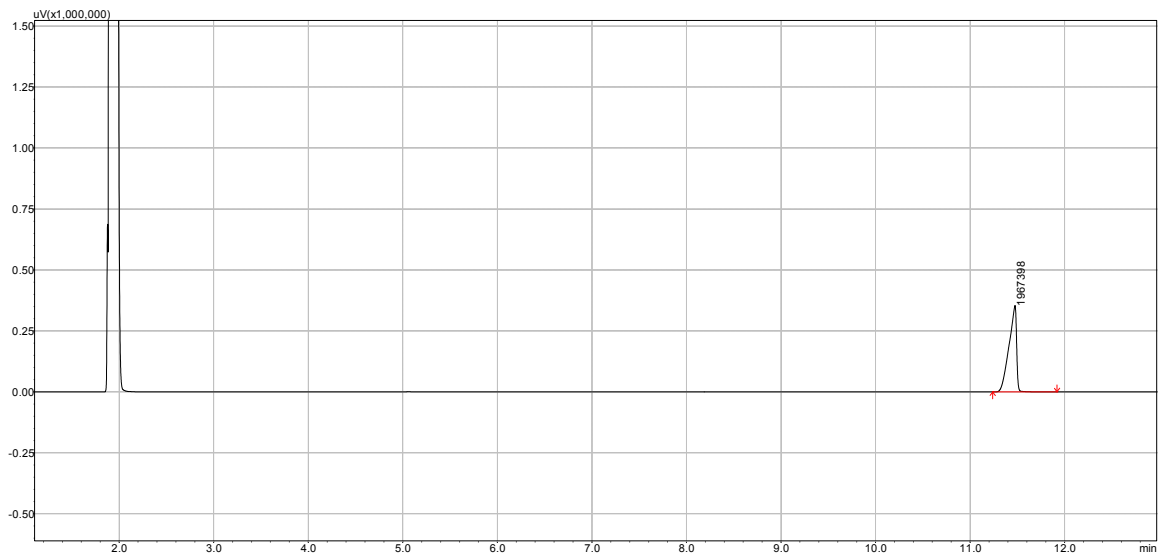

| Peak# | Ret. time | Area      | Height   | Conc.     | Area%    | Compound name             |
|-------|-----------|-----------|----------|-----------|----------|---------------------------|
| 1     | 11.474    | 1967398.3 | 351967.6 | 100.00000 | 100.0000 | 1-(3-bromophenyl)ethanone |

**Gas chromatogram for the oxidation of 1-(3-bromophenyl)ethanol to 1-(3-bromophenyl)ethanone product**

GC conditions are same as standard 1-(3-bromophenyl)ethanol.

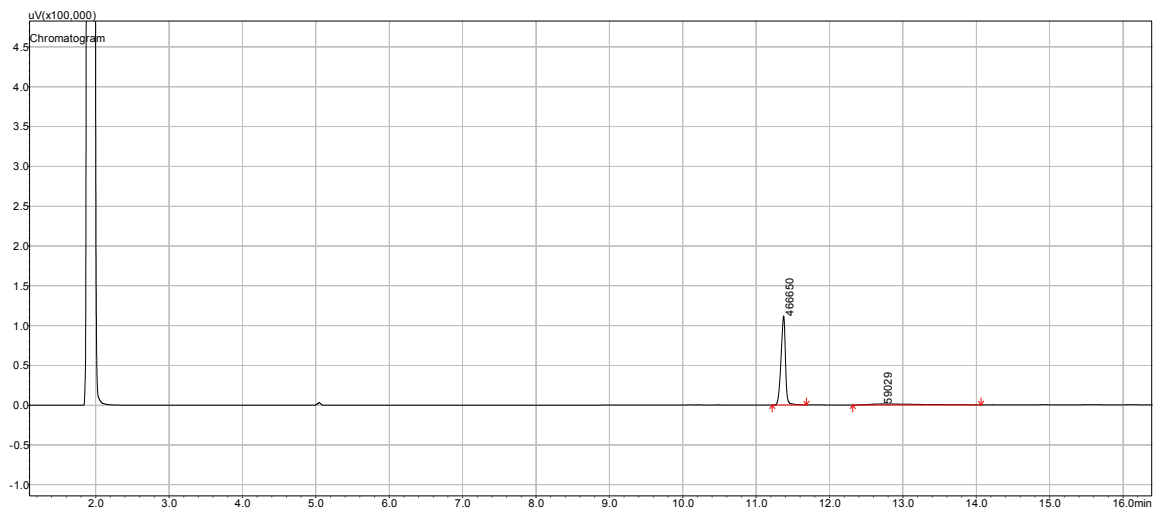

| Peak# | Ret. time | Area     | Height   | Conc.    | Area%   | Compound name             |
|-------|-----------|----------|----------|----------|---------|---------------------------|
| 1     | 11.375    | 466649.7 | 111601.7 | 88.77084 | 88.7708 | 1-(3-bromophenyl)ethanone |

|   |        |         |        |          |         |                          |
|---|--------|---------|--------|----------|---------|--------------------------|
| 2 | 12.716 | 59029.3 | 1301.4 | 11.22916 | 11.2292 | 1-(3-bromophenyl)ethanol |
|---|--------|---------|--------|----------|---------|--------------------------|

### Gas chromatogram for standard 1-(3-nitrophenyl)ethanol

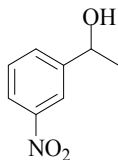

GC conditions for standard 1-(3-nitrophenyl)ethanol. Column information Rtx-5, L = 30m, 0.25mmID, injector temperature 220 °C, column flow rate 1.00 ml/min, column temperature 100 – 180 °C, temperature program 3 °C/min, detector temperature 250 °C.

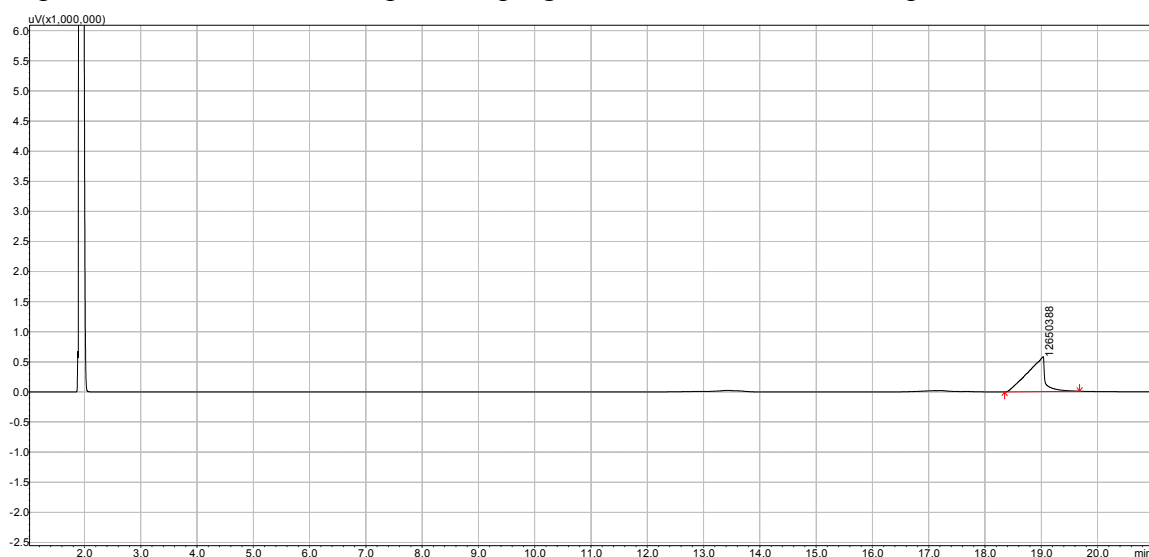

| Peak# | Ret. time | Area       | Height   | Conc.     | Area%    | Compound name            |
|-------|-----------|------------|----------|-----------|----------|--------------------------|
| 1     | 19.034    | 12650388.3 | 576160.6 | 100.00000 | 100.0000 | 1-(3-nitrophenyl)ethanol |

### Gas chromatogram for standard 1-(3-nitrophenyl)ethanone

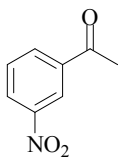

GC conditions are same as standard 1-(3-nitrophenyl)ethanol.

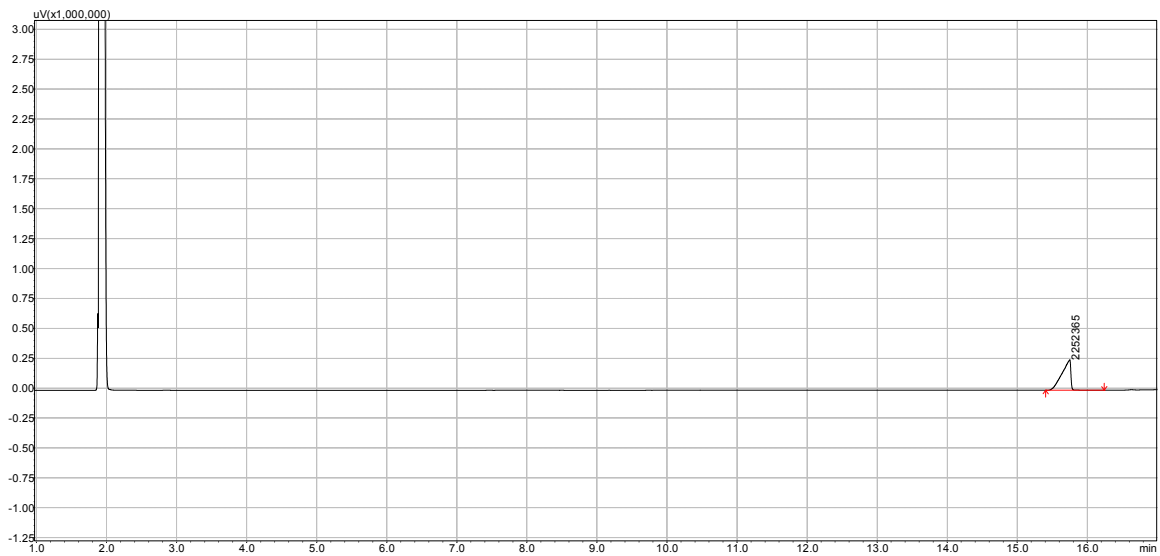

| Peak# | Ret. time | Area      | Height   | Conc.     | Area%    | Compound name             |
|-------|-----------|-----------|----------|-----------|----------|---------------------------|
| 1     | 15.749    | 2252365.3 | 255628.5 | 100.00000 | 100.0000 | 1-(3-nitrophenyl)ethanone |

**Gas chromatogram for the oxidation of 1-(3-nitrophenyl)ethanol to 1-(3-nitrophenyl)ethanone product**

GC conditions are same as standard 1-(3-nitrophenyl)ethanol.

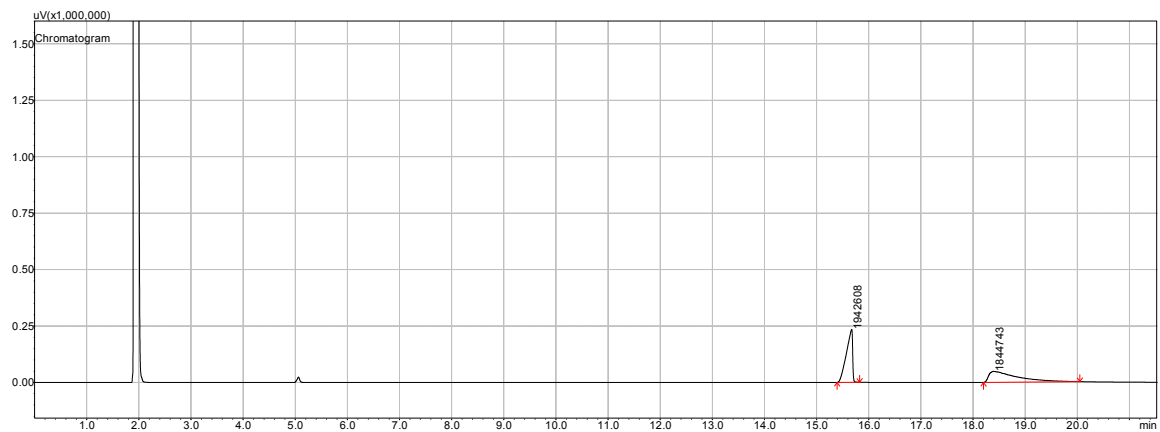

| Peak# | Ret. time | Area      | Height   | Conc.    | Area%   | Compound name             |
|-------|-----------|-----------|----------|----------|---------|---------------------------|
| 1     | 15.673    | 1942608.5 | 234145.0 | 51.29201 | 51.2920 | 1-(3-nitrophenyl)ethanone |
| 2     | 18.394    | 1844742.8 | 48879.4  | 48.70799 | 48.7080 | 1-(3-nitrophenyl)ethanol  |



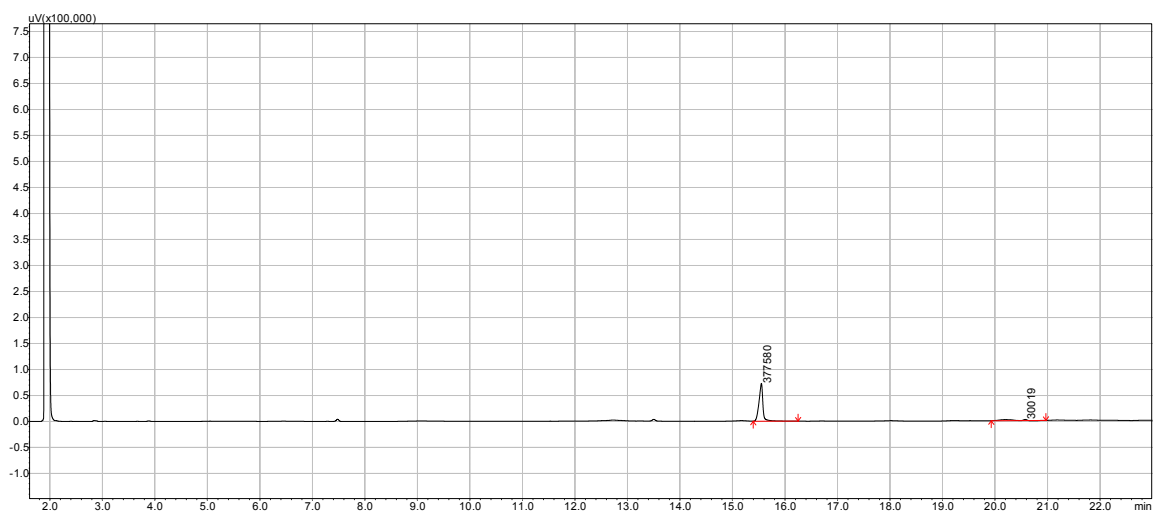

| Peak# | Ret. time | Area     | Height  | Conc.   | Area%  | Compound name             |
|-------|-----------|----------|---------|---------|--------|---------------------------|
| 1     | 15.551    | 377580.3 | 72505.2 | 92.6352 | 15.551 | 1-(3-nitrophenyl)ethanone |
| 2     | 20.575    | 30018.9  | 1912.8  | 7.36480 | 7.3648 | 1-(3-nitrophenyl)ethanol  |

### Gas chromatogram for standard benzyl alcohol

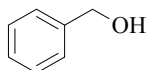

GC conditions for standard benzyl alcohol. Column information Rtx-5, L = 30m, 0.25mmID, injector temperature 220 °C, column flow rate 0.90 ml/min, column temperature 100 – 120 °C, temperature program 5 °C/min, detector temperature 250 °C.

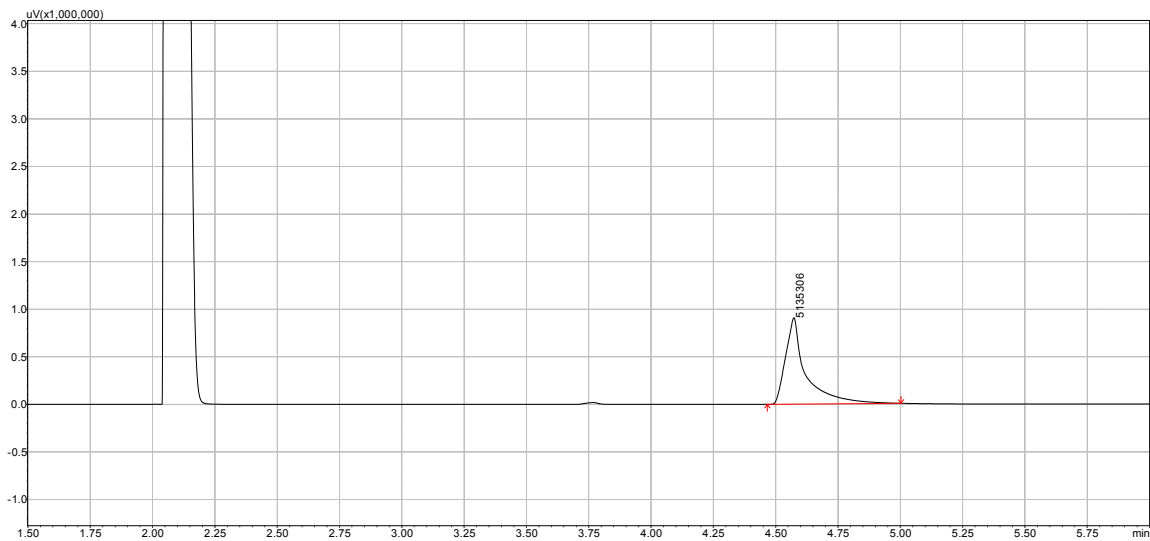

| Peak# | Ret. time | Area      | Height   | Conc.    | Area%    | Compound name  |
|-------|-----------|-----------|----------|----------|----------|----------------|
| 1     | 4.573     | 5135306.2 | 892431.6 | 100.0000 | 100.0000 | Benzyl alcohol |

### Gas chromatogram for standard benzaldehyde

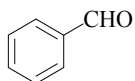

GC conditions are same as benzyl alcohol.

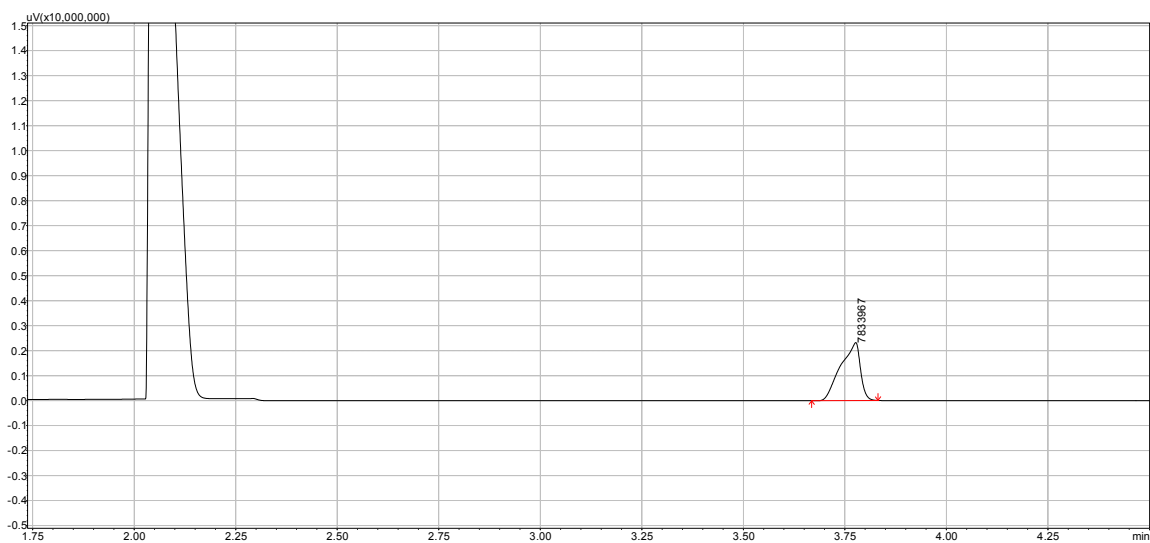

| Peak# | Ret. time | Area | Height | Conc. | Area% | Compound name |
|-------|-----------|------|--------|-------|-------|---------------|
|       |           |      |        |       |       |               |

|   |       |           |           |           |          |              |
|---|-------|-----------|-----------|-----------|----------|--------------|
| 1 | 3.776 | 7833967.4 | 2288133.8 | 100.00000 | 100.0000 | Benzaldehyde |
|---|-------|-----------|-----------|-----------|----------|--------------|

### Gas chromatogram for standard benzoic acid

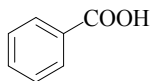

GC conditions are same as benzyl alcohol.

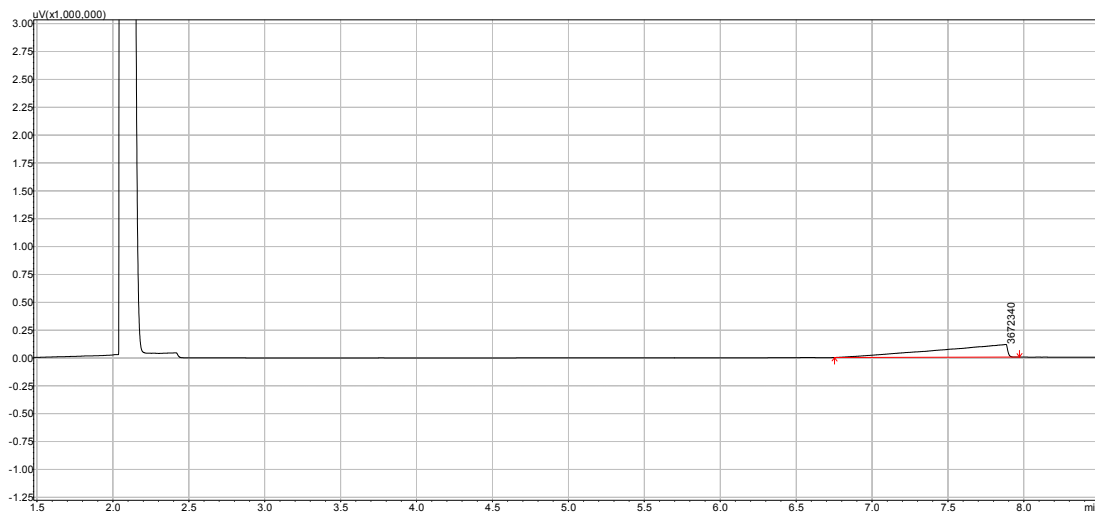

| Peak# | Ret. time | Area      | Height   | Conc.     | Area%    | Compound name |
|-------|-----------|-----------|----------|-----------|----------|---------------|
| 1     | 7.879     | 3672339.7 | 113485.1 | 100.00000 | 100.0000 | Benzoic acid  |

### Gas chromatogram for the oxidation of benzyl alcohol to corresponding carbonyl compounds

GC conditions are same as standard benzyl alcohol.

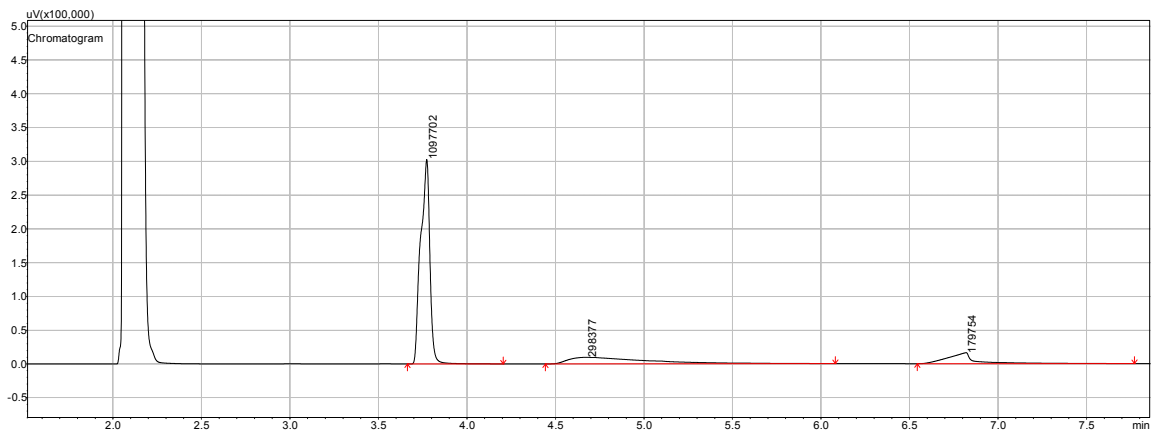

| Peak# | Ret. time | Area      | Height   | Conc.    | Area%   | Compound name  |
|-------|-----------|-----------|----------|----------|---------|----------------|
| 1     | 3.773     | 1097701.6 | 300968.8 | 69.65849 | 69.6585 | Benzaldehyde   |
| 2     | 4.673     | 298377.4  | 9731.8   | 18.93458 | 18.9346 | Benzyl alcohol |
| 3     | 6.819     | 179754.2  | 16263.9  | 11.40693 | 11.4069 | Benzoic acid   |

### Gas chromatogram for standard diphenylmethanol

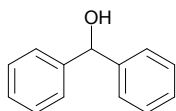

GC conditions for standard diphenylmethanol. Column information Rtx-5, L = 30m, 0.25mmID, injector temperature 220 °C, column flow rate 1.00 ml/min, column temperature 100 – 180 °C, temperature program 3 °C/min, detector temperature 250 °C.

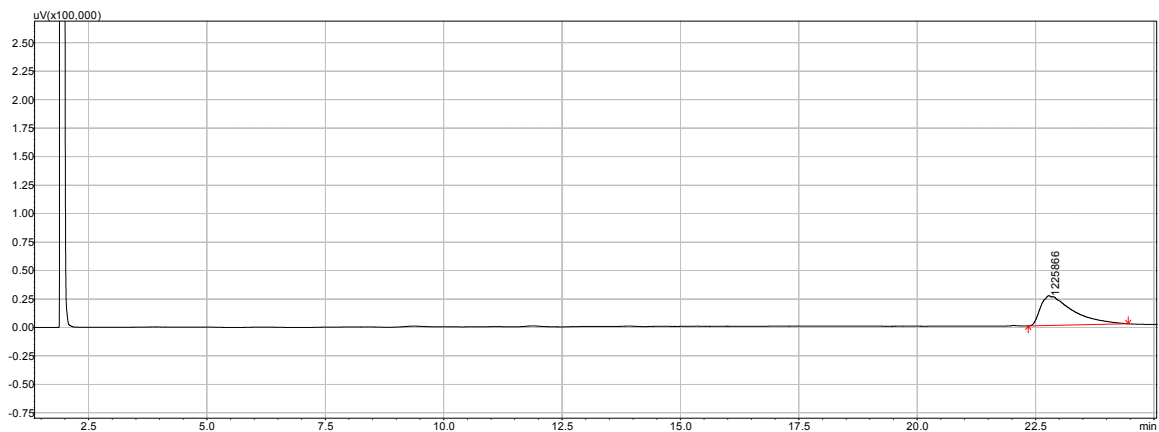

| Peak# | Ret. time | Area | Height | Conc. | Area% | Compound name    |
|-------|-----------|------|--------|-------|-------|------------------|
| 1     | 22.5066   |      |        |       |       | Diphenylmethanol |

|   |        |           |         |          |          |                  |
|---|--------|-----------|---------|----------|----------|------------------|
| 1 | 22.786 | 1225865.6 | 26074.4 | 100.0000 | 100.0000 | diphenylmethanol |
|---|--------|-----------|---------|----------|----------|------------------|

### Gas chromatogram for standard benzophenone

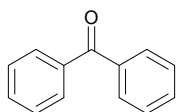

GC conditions are same as standard diphenylmethanol.

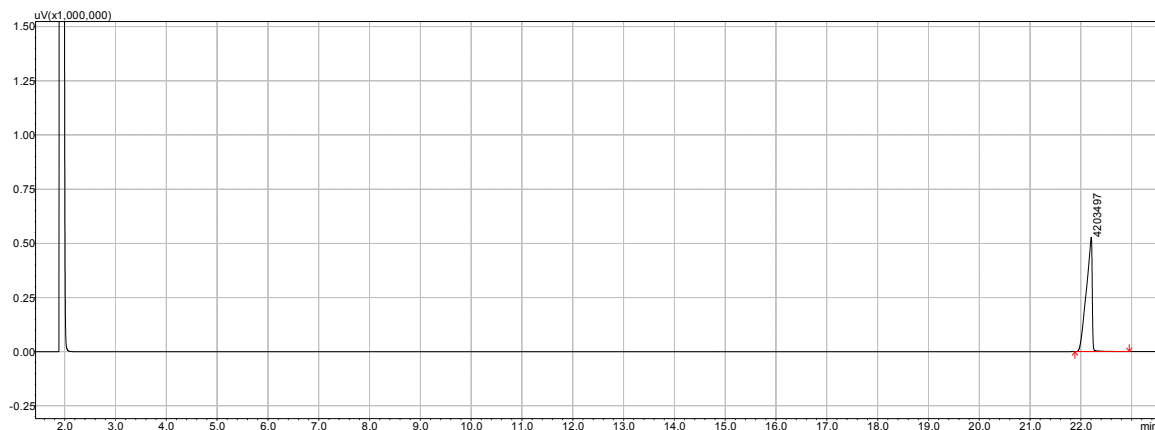

| Peak# | Ret. time | Area      | Height   | Conc.    | Area%    | Compound name |
|-------|-----------|-----------|----------|----------|----------|---------------|
| 1     | 22.204    | 4203496.7 | 526314.4 | 100.0000 | 100.0000 | benzophenone  |

### Gas chromatogram for the oxidation of diphenylmethanol to benzophenone product

GC conditions are same as standard diphenylmethanol.

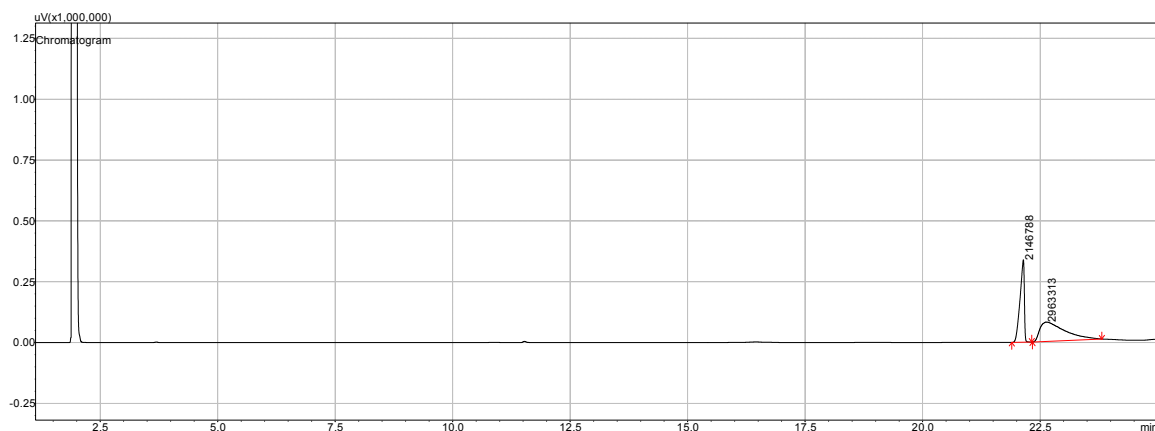

| Peak# | Ret. time | Area      | Height   | Conc.    | Area%   | Compound name    |
|-------|-----------|-----------|----------|----------|---------|------------------|
| 1     | 22.143    | 2146788.2 | 337944.3 | 42.01068 | 42.0107 | benzophenone     |
| 2     | 22.623    | 2963313.5 | 80008.4  | 57.98932 | 57.9893 | diphenylmethanol |

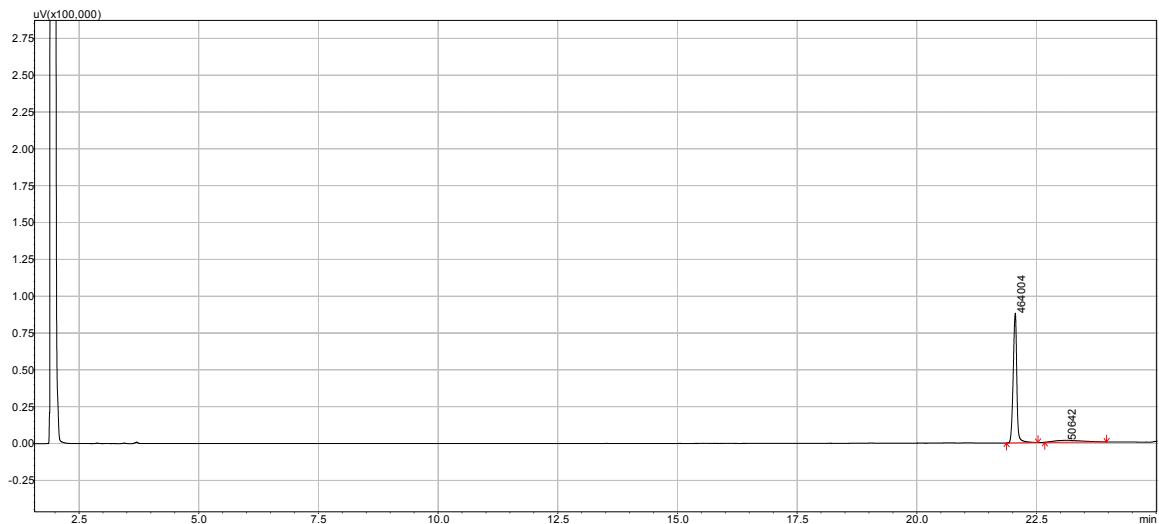

| Peak# | Ret. time | Area     | Height  | Conc.    | Area%   | Compound name    |
|-------|-----------|----------|---------|----------|---------|------------------|
| 1     | 22.056    | 464004.3 | 87811.3 | 90.15991 | 90.1599 | benzophenone     |
| 2     | 23.113    | 50641.6  | 1236.2  | 9.84009  | 9.8401  | diphenylmethanol |

### Gas chromatogram for standard cyclopentanol

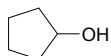

GC conditions for standard cyclopentanol. Column information Rtx-5, L = 30m, 0.25mmID, injector temperature 220 °C, column flow rate 0.90 ml/min, column temperature 100 – 120 °C, temperature program 5 °C/min, detector temperature 250 °C.

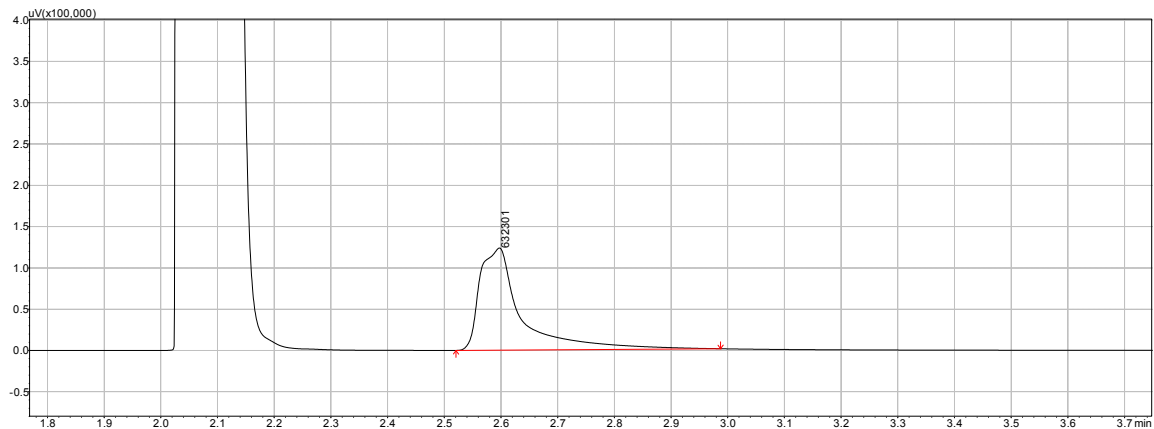

| Peak# | Ret. time | Area     | Height   | Conc.     | Area%    | Compound name |
|-------|-----------|----------|----------|-----------|----------|---------------|
| 1     | 2.597     | 632301.1 | 123262.0 | 100.00000 | 100.0000 | cyclopentanol |

### Gas chromatogram for standard cyclopentanone

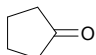

GC conditions are same as standard cyclopentanol.

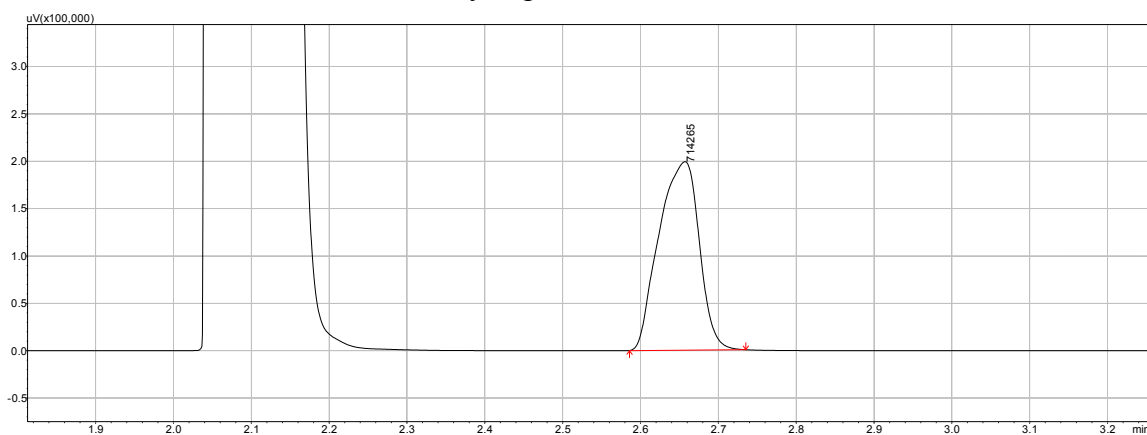

| Peak# | Ret. time | Area     | Height   | Conc.     | Area%    | Compound name  |
|-------|-----------|----------|----------|-----------|----------|----------------|
| 1     | 2.657     | 714264.9 | 198326.7 | 100.00000 | 100.0000 | cyclopentanone |

### Gas chromatogram for the oxidation of cyclopentanol to cyclopentanone product

GC conditions are same as standard cyclopentanol.

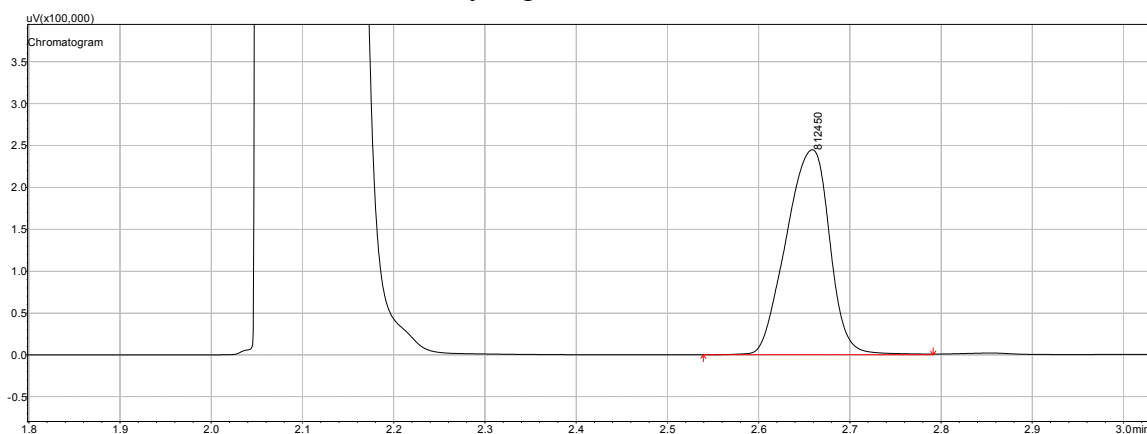

| Peak# | Ret. time | Area     | Height   | Conc.     | Area%    | Compound name  |
|-------|-----------|----------|----------|-----------|----------|----------------|
| 1     | 2.658     | 812449.9 | 244344.7 | 100.00000 | 100.0000 | cyclopentanone |

## Gas chromatogram for standard cyclohexanol

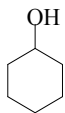

GC conditions for standard cyclohexanol. Column information Rtx-5, L = 30m, 0.25mmID, injector temperature 220 °C, column flow rate 0.90 ml/min, column temperature 100 – 120 °C, temperature program 5 °C/min, detector temperature 250 °C.

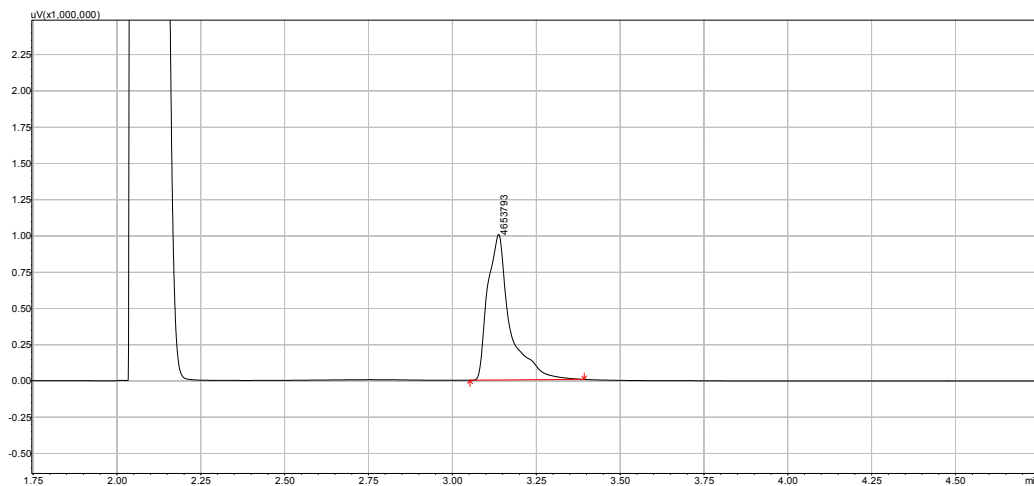

| Peak# | Ret. time | Area      | Height   | Conc.     | Area%    | Compound name |
|-------|-----------|-----------|----------|-----------|----------|---------------|
| 1     | 3.138     | 4653792.8 | 999269.3 | 100.00000 | 100.0000 | Cyclohexanol  |

## Gas chromatogram for standard cyclohexanone

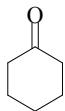

GC conditions are same as standard cyclohexanol.



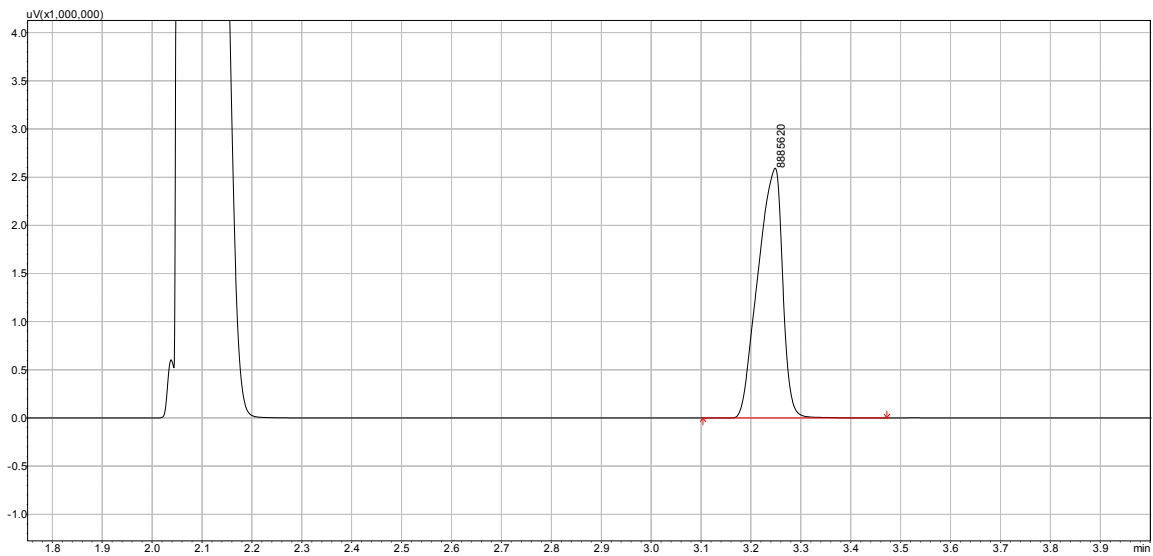

| Peak# | Ret. time | Area      | Height    | Conc.     | Area%    | Compound name |
|-------|-----------|-----------|-----------|-----------|----------|---------------|
| 1     | 3.248     | 8885619.7 | 2558822.3 | 100.00000 | 100.0000 | Cyclohexanone |

**Gas chromatogram for the oxidation of cyclohexanol to cyclohexanone product**

GC conditions are same as standard cyclohexanol.

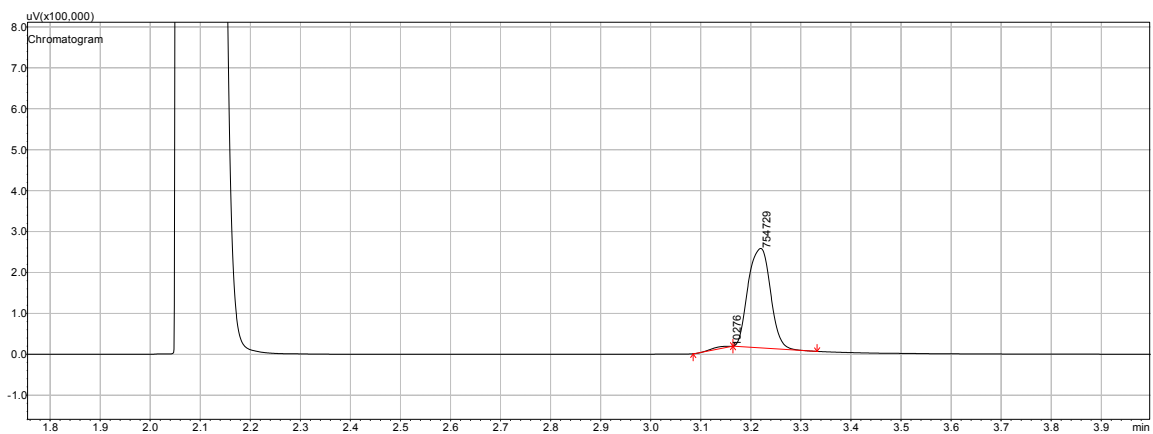

| Peak# | Ret. time | Area     | Height   | Conc.    | Area%   | Compound name |
|-------|-----------|----------|----------|----------|---------|---------------|
| 1     | 3.160     | 10276.0  | 1021.0   | 1.34326  | 1.3433  | cyclohexanol  |
| 2     | 3.219     | 754729.3 | 240360.1 | 98.65674 | 98.6567 | cyclohexanone |

**Gas chromatogram for standard n-butanol**

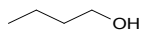

GC conditions for standard n-butanol. Column information Rtx-5, L = 30m, 0.25mmID, injector temperature 220 °C, column flow rate 0.96 ml/min, column temperature 70 – 120 °C, temperature program 3 °C/min, detector temperature 250 °C.

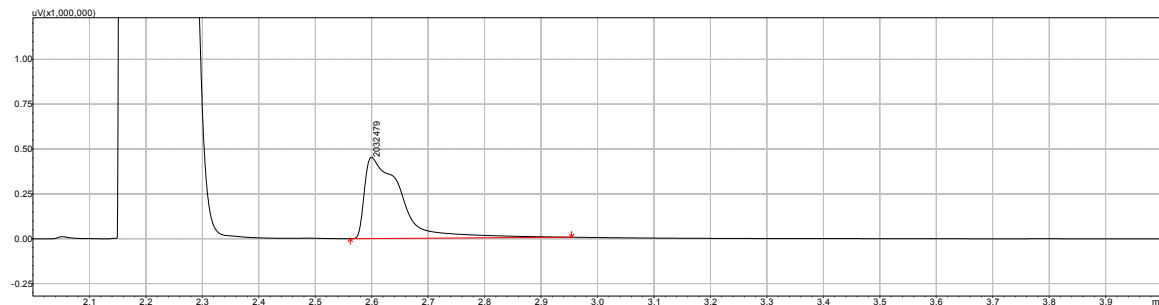

| Peak# | Ret. time | Area      | Height   | Conc.     | Area%    | Compound name |
|-------|-----------|-----------|----------|-----------|----------|---------------|
| 1     | 2.600     | 2032479.3 | 447332.2 | 100.00000 | 100.0000 | n-butanol     |

### Gas chromatogram for standard butyric acid

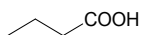

GC conditions are same as standard n-butanol.

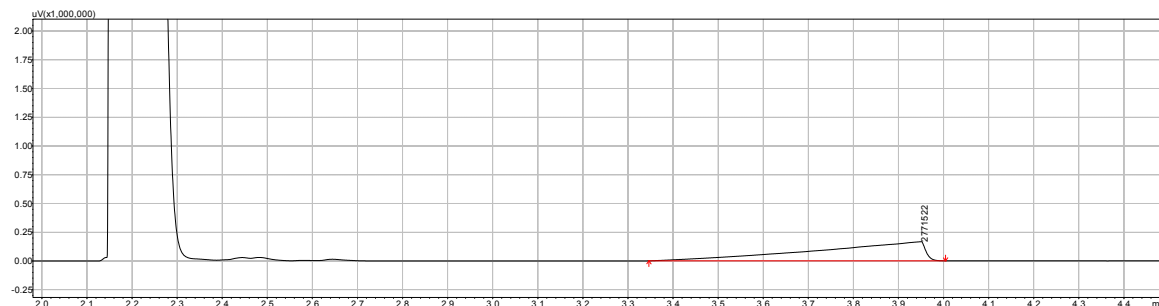

| Peak# | Ret. time | Area      | Height   | Conc.     | Area%    | Compound name |
|-------|-----------|-----------|----------|-----------|----------|---------------|
| 1     | 3.947     | 2771521.8 | 164376.2 | 100.00000 | 100.0000 | Butyric acid  |

### Gas chromatogram for standard butyraldehyde

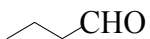

GC conditions are same as standard n-butanol.

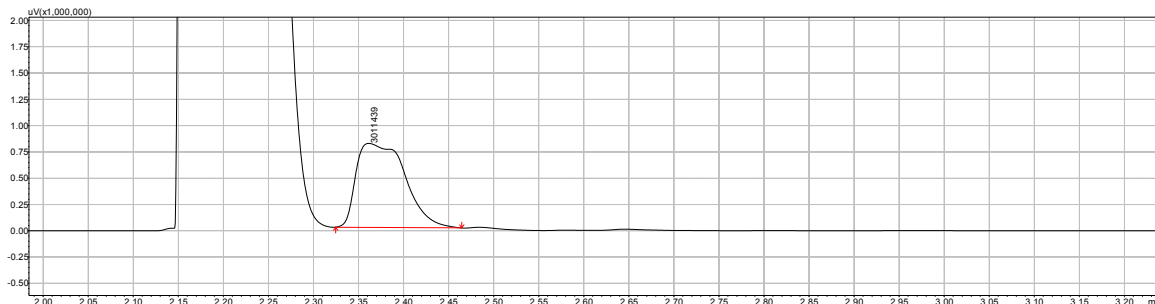

| Peak# | Ret. time | Area      | Height   | Conc.     | Area%    | Compound name |
|-------|-----------|-----------|----------|-----------|----------|---------------|
| 1     | 2.362     | 3011438.9 | 793325.7 | 100.00000 | 100.0000 | Butyraldehyde |

### Gas chromatogram for the n-butanol oxidation product

GC conditions are same as standard n-butanol.

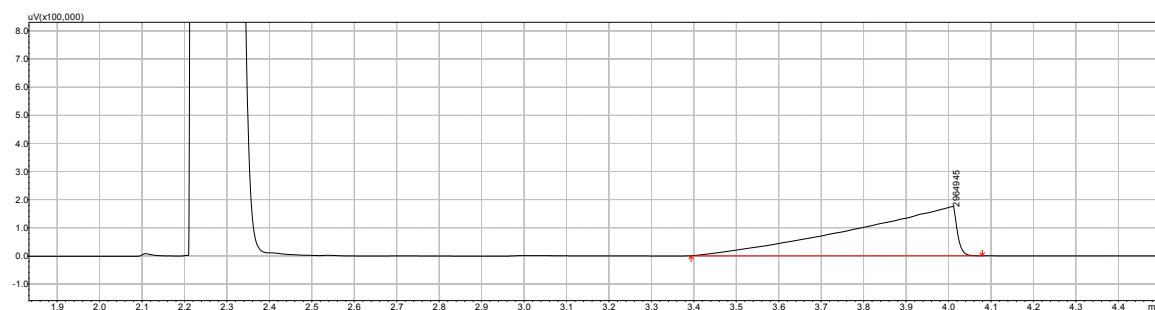

| Peak# | Ret. time | Area      | Height   | Conc.     | Area%    | Compound name |
|-------|-----------|-----------|----------|-----------|----------|---------------|
| 1     | 4.006     | 2964944.6 | 174506.4 | 100.00000 | 100.0000 | Butyric acid  |

### Gas chromatogram for the n-butanol oxidation product at 3h.

GC conditions are same as standard n-butanol.

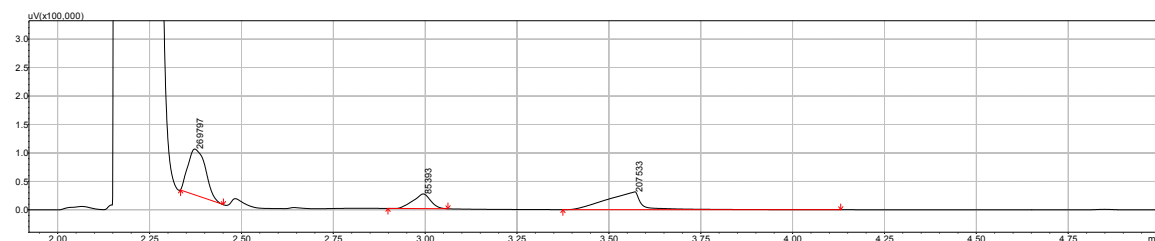

| Peak# | Ret. time | Area     | Height  | Conc.    | Area%   | Compound name |
|-------|-----------|----------|---------|----------|---------|---------------|
| 1     | 2.373     | 269797.4 | 80337.4 | 47.94493 | 47.9449 | Butyraldehyde |
| 2     | 2.995     | 85393.2  | 25701.9 | 15.17498 | 15.1750 | n-butanol     |
| 3     | 3.569     | 207533.0 | 30959.9 | 36.88009 | 36.8801 | Butyric acid  |

**Gas chromatogram for standard n-butanol (GC column was damaged due to this GC conditions were reset)**

GC conditions for standard n-butanol. Column information Rtx-5, L = 30m, 0.25mmID, injector temperature 220 °C, column flow rate 0.35 ml/min, column temperature 60 – 90 °C, temperature program 3 °C/min, detector temperature 250 °C.

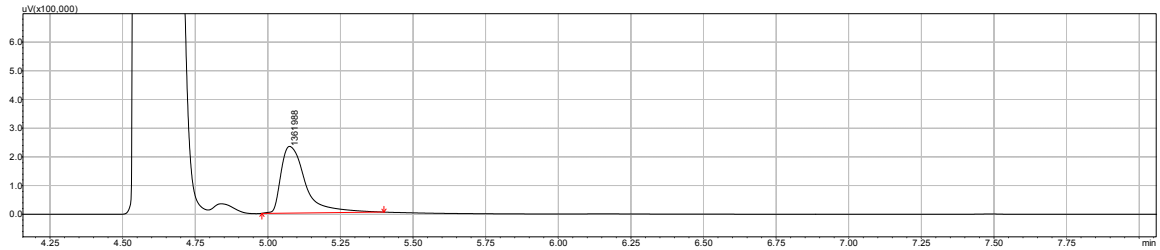

| Peak# | Ret. time | Area      | Height   | Conc.     | Area%    | Compound name |
|-------|-----------|-----------|----------|-----------|----------|---------------|
| 1     | 5.075     | 1361987.6 | 232244.4 | 100.00000 | 100.0000 | n-butanol     |

**Gas chromatogram for standard butyraldehyde**

GC conditions are same as above standard n-butanol.

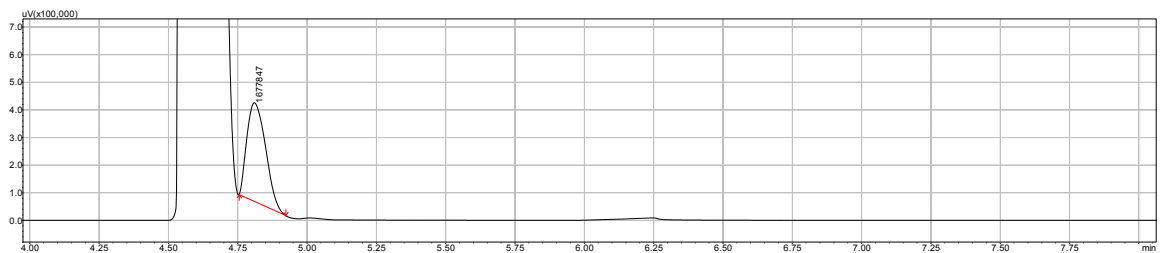

| Peak# | Ret. time | Area      | Height   | Conc.     | Area%    | Compound name |
|-------|-----------|-----------|----------|-----------|----------|---------------|
| 1     | 4.810     | 1677847.3 | 353799.8 | 100.00000 | 100.0000 | Butyraldehyde |

**Gas chromatogram for standard butyric acid**

GC conditions are same as above standard n-butanol.

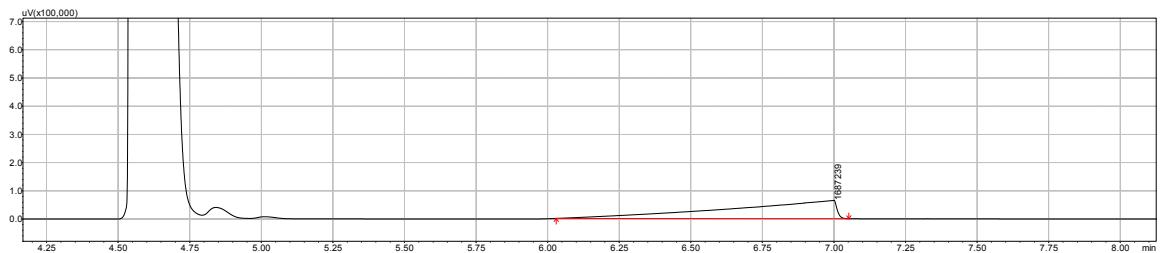

| Peak# | Ret. time | Area      | Height  | Conc.     | Area%    | Compound name |
|-------|-----------|-----------|---------|-----------|----------|---------------|
| 1     | 6.997     | 1687238.8 | 64675.3 | 100.00000 | 100.0000 | Butyric acid  |

**Gas chromatogram for the n-butanol oxidation product (under N<sub>2</sub>-atm) at 3 h.**  
 GC conditions are same as above standard n-butanol.

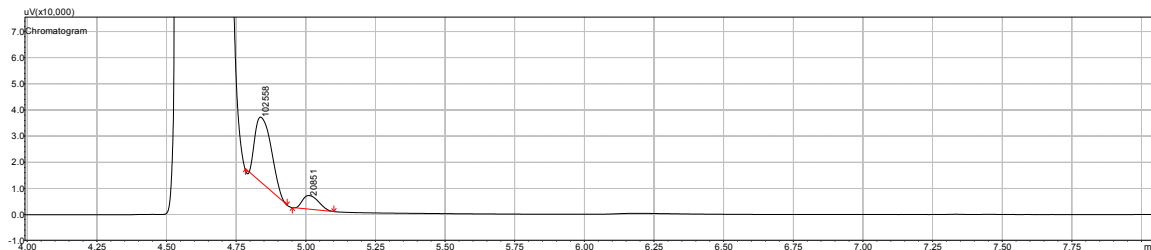

| Peak# | Ret. time | Area     | Height  | Conc.    | Area%   | Compound name |
|-------|-----------|----------|---------|----------|---------|---------------|
| 1     | 4.838     | 102558.3 | 24713.4 | 83.10415 | 83.1041 | Butyraldehyde |
| 2     | 5.010     | 20851.1  | 5184.4  | 16.89585 | 16.8959 | n-butanol     |

#### IV) <sup>1</sup>H NMR data for all the catalytic products

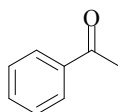

<sup>1</sup>H NMR (400 MHz, CDCl<sub>3</sub>): δ 7.94 – 7.91 (m, 2H, ArH); 7.55 – 7.52 (m, 1H, ArH); 7.45 – 7.41 (m, 2H, ArH); 2.57 (s, 3H, CH<sub>3</sub>) ppm.

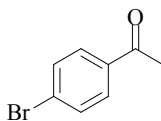

<sup>1</sup>H NMR (400 MHz, CDCl<sub>3</sub>) δ 7.81 – 7.78 (m, 2H, ArH); 7.59 – 7.57 (m, 2H, ArH); 2.56 (s, 3H, CH<sub>3</sub>) ppm.

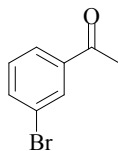

<sup>1</sup>H NMR (400 MHz, CDCl<sub>3</sub>) δ 7.99 – 7.98 (t, 1H, ArH); 7.79 – 7.77 (m, 1H, ArH); 7.60 – 7.59 (m, 1H, ArH); 7.27 – 7.24 (t, 1H, ArH); 2.50 (s, 3H, CH<sub>3</sub>) ppm.

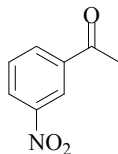

$^1\text{H NMR}$  (400 MHz,  $\text{CDCl}_3$ )  $\delta$  8.75 – 8.74 (s, 1H, ArH); 8.41 – 8.39 (m, 1H, ArH); 8.28 – 8.25 (m, 1H, ArH); 7.68 – 7.64 (t, 1H); 2.67 (s, 3H) ppm.

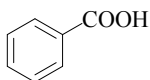

$^1\text{H NMR}$  (400 MHz,  $\text{CDCl}_3$ )  $\delta$  10.00 (s, 1H, COOH); 8.11 – 8.09 (d, 2H, ArH); 7.87 – 7.85 (t, 1H, ArH); 7.63 – 7.57 (t, 2H, ArH) ppm.

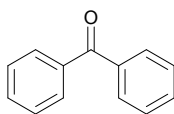

$^1\text{H NMR}$  (400 MHz,  $\text{CDCl}_3$ )  $\delta$  7.81 – 7.79 (m, 4H, ArH); 7.61 – 7.57 (m, 2H, ArH); 7.50 – 7.46 (m, 4H, ArH) ppm.

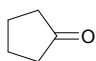

$^1\text{H NMR}$  (400 MHz,  $\text{CDCl}_3$ )  $\delta$  2.14 – 2.08 (t, 4H, 2CH<sub>2</sub>); 1.94 – 1.87 (m, 4H, 3CH<sub>2</sub>) ppm.

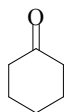

$^1\text{H NMR}$  (400 MHz,  $\text{CDCl}_3$ )  $\delta$  2.33 – 2.27 (t, 4H, 2CH<sub>2</sub>); 1.84 – 1.61 (m, 6H, 3CH<sub>2</sub>) ppm.

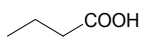

$^1\text{H NMR}$  (400 MHz,  $\text{CDCl}_3$ )  $\delta$  9.99 (s, 1H, COOH); 2.32 – 2.28 (t, 2H, CH<sub>2</sub>); 1.66 – 1.61 (m, 2H, CH<sub>2</sub>); 0.96 – 0.91 (t, 3H, CH<sub>3</sub>) ppm.

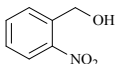

$^1\text{H NMR}$  (400 MHz, DMSO)  $\delta$  8.03 – 8.01 (d, 1H, ArH); 7.83 – 7.81 (d, 1H, ArH); 7.77 – 7.73 (t, 1H, ArH); 7.53 – 7.49 (t, 1H, ArH); 5.55 – 5.53 (t, 1H, OH); 4.81 – 4.80 (d, 2H, CH<sub>2</sub>OH) ppm.

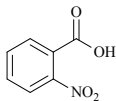

$^1\text{H}$  NMR (400 MHz, DMSO)  $\delta$  10.2 (s, 1H, COOH); 7.73 – 7.68 (m, 2H, ArH); 7.65 – 7.57 (m, 2H, ArH) ppm.

Impurity

$^1\text{H}$  NMR (400 MHz, DMSO)  $\delta$  7.92 – 7.90 (m, 1H, ArH); 7.81 – 7.79 (d, 1H, ArH), 7.73 – 7.71 (t, 2H, ArH); 7.49 – 7.45 (t, 1H, ArH); 7.41 – 7.37 (m, 2H, ArH); 5.45 – 5.42 (t, 1H, OH); 5.25 – 5.22 (t, 1H, OH); 4.75 – 4.74 (d, 2H, CH<sub>2</sub>); 4.60 – 4.58 (d, 2H, CH<sub>2</sub>) ppm.

### Recycling and recovery of the catalyst

After completion of reaction the organic product was separated by diethyl ether and the catalyst remain in aqueous phase. The separated aqueous phase was reused for further catalysis without adding of extra catalyst and the catalyst was also recovered by the following procedure. The aqueous phase was evaporated at room temperature. A solid material obtained was washed with ethanol and the precipitate was air-dried. Then a solid compound was collected and characterized with FT-IR. The FT-IR spectrum of used catalyst after 5<sup>th</sup> cycle was same as fresh catalyst (see figure S2). The same procedure was applied for all POM catalysts.

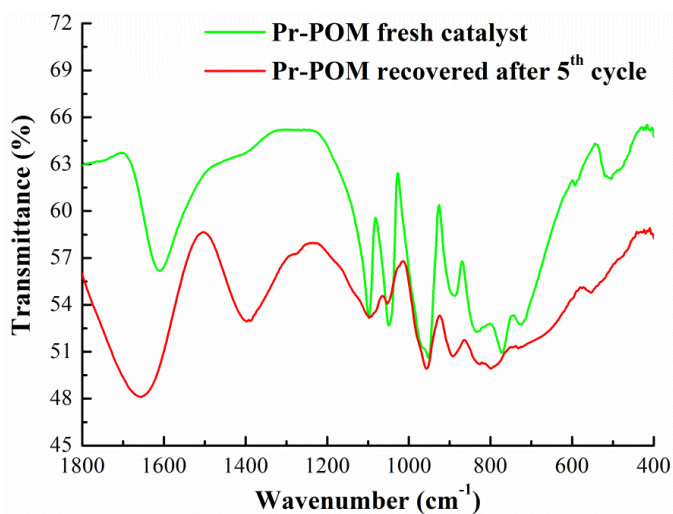

**Figure S2** Comparison of FT-IR spectra of fresh **Pr-POM** and recovered solid **Pr-POM** catalyst after 5<sup>th</sup> cycle.

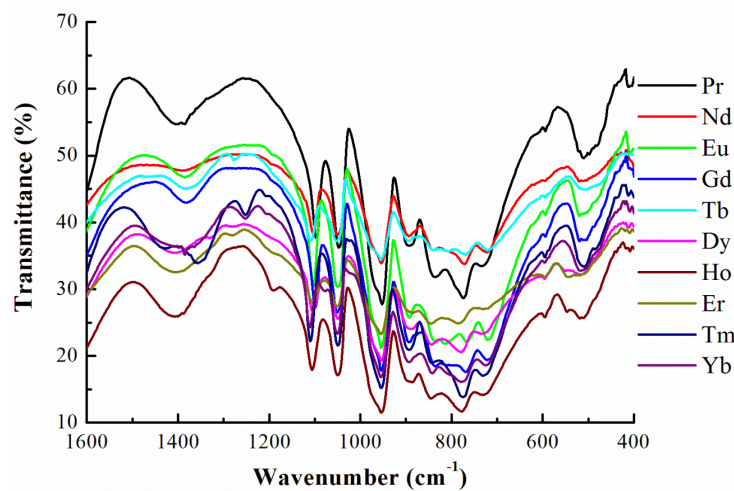

**Figure S3** The FT-IR spectra of **Pr – Yb** recovered POM catalysts after 1<sup>st</sup> cycle.
